# A lipid-associated macrophage lineage rewires the spatial landscape of adipose tissue in early obesity

Cooper M. Stansbury<sup>1,2</sup>, Gabrielle A. Dotson<sup>1</sup>, Harrison Pugh<sup>1</sup>, Alnawaz Rehemtulla<sup>3</sup>, Indika Rajapakse<sup>1,4</sup>, and Lindsey A. Muir<sup>1\*</sup>

<sup>1</sup>Department of Computational Medicine and Bioinformatics, University of Michigan, Ann Arbor, MI 48109 USA

<sup>2</sup>The Michigan Institute for Computational Discovery and Engineering, University of Michigan, Ann Arbor, MI 48109 USA

<sup>3</sup>Department of Radiation Oncology, University of Michigan, Ann Arbor, MI 48109 USA

<sup>4</sup>Department of Mathematics, University of Michigan, Ann Arbor, MI 48109 USA

\*To whom correspondence should be addressed (lindmuir@umich.edu; 1600 Huron Parkway, NCRC B520-3368, Ann Arbor, MI 48109).

## 1 Graphical Abstract

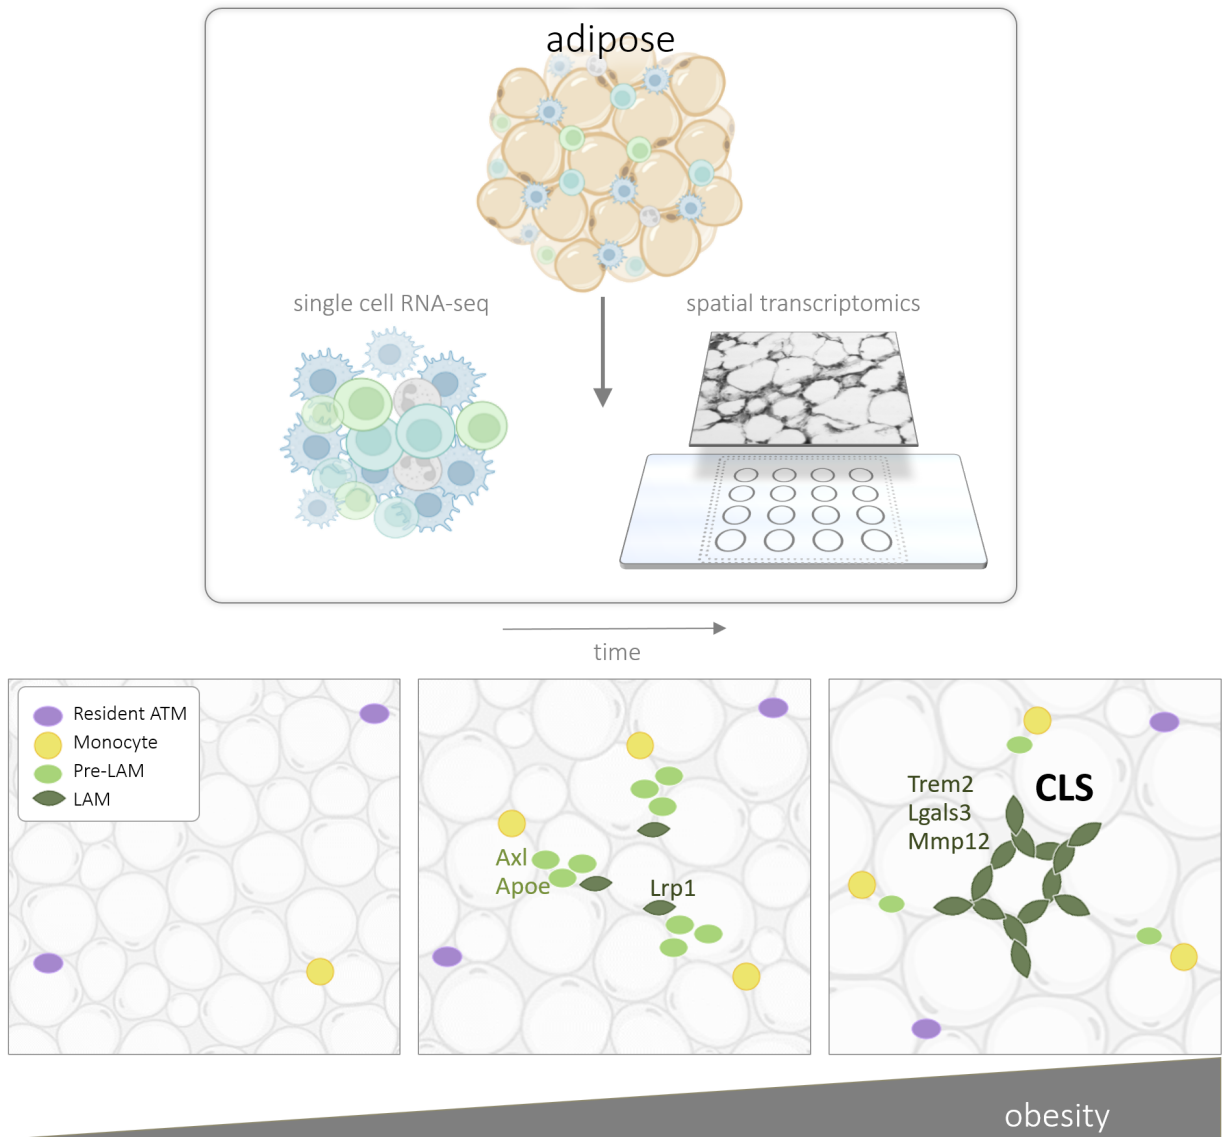

2

3

#### 4 ABSTRACT

5 **Objective:** Obesity-induced metabolic dysfunction, tissue remodelling, and chronic inflammation in visceral  
6 white adipose-tissue (WAT) are correlated with insulin resistance, type II diabetes, and metabolic disease  
7 pathogenesis [1]. In this work, we sought to establish spatio-temporal context of adipose tissue macrophage  
8 (ATM) reprogramming during obesity.

9 **Methods:** We captured single-cell RNA-sequencing, spatial transcriptomics, and histological imaging  
10 of murine WAT over the course of diet-induced obesity to study macrophage phenotype dynamics. We  
11 developed a straightforward mathematical approach to integrating multi-modal data to quantify obesity-  
12 induced changes to WAT organization. We aligned ATM phenotypes with crown-like structures (CLS)  
13 in early obesity and used spatial network analysis to uncover signalling mechanisms implicated in CLS  
14 formation.

15 **Results:** We identified novel diversity of the lipid-associated macrophage (LAM) phenotype, whose tran-  
16 scriptional profile, signaling mechanisms, and spatial context serve as indicators of CLS formation in early  
17 obesity. We demonstrated that dysregulation of lipid-metabolic signalling is a critical turning point in the  
18 monocyte-LAM lineage and identified novel ligand-receptor mechanisms including *ApoE*, *Lrp1*, *Lpl* and *App*  
19 that serve as hallmarks of nascent CLS in WAT.

20 **Conclusions:** Multi-modal spatio-temporal profiling demonstrates that LAMs disproportionately accumu-  
21 late in CLS and are preceded by a transition-state macrophage phenotype with monocytic origins. We  
22 identified novel ligand-receptor interactions implicated in nascent CLS regions which may guide future  
23 cellular-reprogramming interventions for obesity-related sequelae.

#### 24 Highlights

- 25 - We characterize a novel lipid-associated macrophage (LAM) phenotype along the monocyte-LAM lin-  
26 eage
- 27 - Integrated imaging, single-cell sequencing and spatial transcriptomics data show that LAMs accumulate  
28 at nascent CLS
- 29 - Analysis of spatial transcriptomics data reveals a novel set of ligands and receptors that implicate  
30 immature LAMs in shaping the CLS microenvironment in early obesity
- 31 - We present a simple mathematical framework for studying dynamics of tissue-structure over time

## 32 1. INTRODUCTION

33 Obesity is associated with chronic inflammation and metabolic dysfunction in mice and humans [2, 3, 4, 5].  
34 Increased metabolic demand requires remodeling of white adipose-tissue (WAT) that results in changes to  
35 WAT structure and function [6, 7]. Normal WAT function requires coordination between multiple cell types  
36 including stromal vascular cells, immune cells, and adipocytes, which are the largest cellular constituent of  
37 WAT by volume [6, 8]. In obesity, WAT composition is dramatically altered and cells undergo dynamic  
38 changes to their morphology and phenotype that culminate in adipocyte hypertrophy and cell death [6, 9].  
39 The dynamics of WAT immune cells during obesity are well-documented, but the molecular mechanisms  
40 regulating immune and metabolic dysfunction and their spatial organization within WAT remain poorly  
41 understood.

42 Immune cells help maintain healthy WAT homeostatic function and participate in WAT remodeling in  
43 response to changes in metabolic demand. The hallmark of obesity-induced immune dysregulation is in-  
44 creased abundance and diversity of macrophages in WAT [10, 11, 12]. Both tissue-resident macrophages and  
45 macrophages derived from recruited monocytes acquire poorly understood activation states during obesity-  
46 induced WAT remodelling [10, 11, 13, 14]. Changes in the macrophage transcriptional program are critical  
47 milestones in the development of insulin resistance, type II diabetes, and other metabolic disorders [10, 14]  
48 and are shown to persist after weight loss [15, 16, 12].

49 Previous single cell studies have cataloged WAT cellular composition, thus refining our understanding of  
50 immune cell phenotypes in obesity [10, 8, 13, 11]. However, single cell molecular profiling does not allow  
51 for analysis of the spatial patterning of tissue structure. Recent studies in humans have mapped single cell  
52 genomic profiles onto spatial transcriptomics data in order to characterize spatial patterning WAT cellular  
53 composition [6, 17]. However, a spatial understanding of obesity-induced WAT-remodelling over the time-  
54 course of metabolic disruption is lacking.

55 We sought to spatially contextualize immune cell phenotype dynamics in early and chronic obesity. In  
56 this study we sequenced thousands of single cells from murine WAT at different stages of diet-induced  
57 obesity and characterized transcriptional dynamics associated with the development of insulin resistance.  
58 To characterize the spatial context of obesity-driven immune cell dysregulation, we mapped tissue-specific  
59 genomic signatures to the WAT landscape using spatial transcriptomics. We developed a network approach  
60 to analyze the spatial organization of immune-dysregulation and used graph-theoretic measures to quantify  
61 changes to WAT structure.

62 We quantified the spatio-temporal dynamics of WAT macrophage infiltration and differentiation and iden-  
63 tified cellular signalling mechanisms implicated in WAT remodelling. We describe novel diversity of the  
64 *Trem2*<sup>+</sup> lipid-associated macrophage (LAM) phenotype, whose transcriptional profile, molecular signalling  
65 mechanisms, and spatial context suggest a critical role in the formation of CLS in early obesity.

## 66 2. MATERIALS AND METHODS

### 67 2.1. Animals

68 C57BL/6J mice were used for all experiments (Jackson Laboratories 000664). Male mice were fed ad libitum  
69 a control normal chow diet (ND; 13.4% fat, 5L0D LabDiet) or high-fat diet (HFD; 60% calories from fat,  
70 Research Diets D12492) for the indicated amount of time starting at 9 weeks old. Animals were housed in  
71 a specific pathogen-free facility with a 12 h light/12 h dark cycle and given free access to food and water  
72 except for withdrawal of food for temporary fasting associated with glucose tolerance tests. All mouse  
73 procedures were approved by the Institutional Animal Care and Use Committee (IACUC) at the University  
74 of Michigan (Animal Welfare Assurance Number D16-00072 (A3114-01), #PRO00008583), and care was  
75 taken to minimize suffering adhering to the Institute of Laboratory Animal Research Guide for the Care and  
76 Use of Laboratory Animals.

### 77 2.2. Glucose Tolerance Tests

78 For glucose tolerance tests (GTT), starting four hours into the light cycle, mice were fasted with ad libitum  
79 access to water for six hours in clean cages. A 100 mg/mL D-glucose (Sigma G7021) solution was prepared  
80 in sterile -/- DPBS and injected at 0.7 g/kg of body weight. Area under the curve (AUC) calculations were  
81 performed using the log trapezoidal method.

### 82 2.3. Stromal Cell Isolation and Immune Cell Enrichment

83 Stromal vascular cells (SVCs) were collected from adipose tissues as in [4]. After cardiac perfusion, adipose  
84 tissues were collected, minced finely to 3-5 mm pieces, and added to ice cold HBSS+Ca/Mg. Up to 1.5 g  
85 of tissue per sample was digested in 10 ml of 1 mg/mL collagenase II (Sigma C68850) in HBSS+Ca/Mg  
86 at 37°C for 45 minutes with vigorous shaking. Digests were filtered through buffer-soaked 100 micron  
87 cell strainers and centrifuged at 300 x g at 4C to pellet SVCs. SVCs were enriched for CD45<sup>+</sup> immune  
88 cells using Biolegend MojoSort Mouse CD45 Nanobeads (Biolegend 480027), following the manufacturer's  
89 protocol. Briefly, SVC pellets were resuspended in 1 mL MojoSort Buffer, pooling the four samples from  
90 each cohort into a single respective cohort tube (ND, 8w, 14w), then filtered through a 70 micron cell strainer  
91 and placed in 5 mL polypropylene tubes. After addition of nanobeads, samples were sequentially processed  
92 for magnetic separation. Three magnetic separations in total were performed on the labeled fractions for  
93 increased purity. Final cell suspensions were filtered through 40 micron pipette tip filters. Cell viability was  
94 >80% with <15% aggregation.

### 95 2.4. Feature Barcoding and Single Cell RNA-sequencing Library Preparation

96 CD45<sup>+</sup> SVCs were feature barcoded using TotalSeqB (Biolegend) antibodies (F4/80, CD11b, Mac-2, CD3,  
97 CD4, CD19). Library preparation was performed by the University of Michigan Single Cell Sequencing core  
98 using the 10x Genomics Chromium Single Cell Kit (3'V3, #220103/PN120262). 100 million reads from up  
99 to 5,000 cells were collected for single cell transcript data, and 25 million reads from up to 5,000 cells were  
100 collected for feature barcoding data.

### 101 2.5. Spatial transcriptomics tissue and library preparation

102 Within 30 minutes of cardiac perfusion, epididymal WAT samples that were contralateral to those used for  
103 scRNA-seq were pre-soaked in ice cold O.C.T. Compound (VWR 25608-930) and placed in biopsy cryomolds  
104 (VWR 25608-922) with fresh O.C.T., rapidly frozen by immersion in isopentane cooled using liquid nitrogen,  
105 and kept on dry ice or at -80°C until sectioning. Fresh tissue sections were cut at 10  $\mu$ m after 20 minute  
106 equilibration in a cryochamber set to -26°C or below with specimen arm at -40°C. Sections were placed onto  
107 the Visium Spatial Gene Expression slide and subsequent processing and library preparation were performed  
108 by the University of Michigan In Vivo Animal Core pathology laboratory and the Advanced Genomics Core  
109 according to the manufacturer's protocol (10x Genomics PN-1000184).

### 110 2.6. Tissue histology and immunostaining

111 Hematoxylin and eosin (H&E) and immunostaining were performed in the ULAM In Vivo Animal Core  
112 pathology laboratory at the University of Michigan. After fixation for 48 hours in 10% neutral buffered  
113 formalin, tissues were trimmed, cassetted, and processed to paraffin in an automated tissue processor (TIS-

114 sueTek, Sakura). Processed tissues were embedded in paraffin and sectioned at 4 microns on a rotary  
115 microtome (Leica Biosystems, Buffalo Grove, IL). Tissues were mounted on glass slides and stained with  
116 hematoxylin and eosin using routine protocols on an automated histostainer (Leica ST5010 Autostainer,  
117 Leica Biosystems), followed by coverslipping.

## 118 2.7. Data processing

119 Single cell RNA-sequencing files were processed using the 10X Genomics CellRanger (version 4.0.0) pipeline.  
120 The resulting filtered matrices were analyzed using `scanpy` [18]. Briefly, we filtered out cells that did not  
121 express at least 500 genes and genes that were not expressed in at least 10 cells, resulting in 13,820 cells  
122 and 31,053 genes across all diet conditions (1,261 ND cells, 6,123 8w HFD cells, and 6,436 14w HFD cells).  
123 We normalized read-counts per cell after filtering. Spatial sequencing data were processed using the 10X  
124 Genomics SpaceRanger (version 1.0.0) pipeline with mouse reference GRCm38, and resulting feature-barcode  
125 matrices were loaded into `scanpy` [18] for further analysis. We filtered out capture spots that expressed fewer  
126 than 5 genes from all subsequent analysis. We normalized read-counts per capture spot after filtering.

## 127 2.8. scRNA-seq clustering and visualization

128 Clustering was performed on cells from each time point independently using Algorithm 1. Preprocessing and  
129 clustering were performed using Python and the single cell gene expression package `scanpy` [18]. scRNA-seq  
130 data were normalized and log-transformed before dimension reduction using principal component analysis  
131 (PCA) with  $r = 50$ . We constructed the similarity matrix  $\mathbf{A}$  using  $k = 9$  neighbors and Euclidean distance  
132 prior to clustering with the Leiden clustering method [19] with resolution parameter  $\gamma = 0.95$ . This analysis  
133 resulted in 18 clusters in ND, 25 in 8w HFD fed mice, and 20 in 14w HFD fed mice. Visualization of  
134 data was performed using uniform manifold approximation and projection (UMAP) [20]. Dimensionality  
135 was reduced using PCA ( $r = 10$ ) on the combined set of genes with non-zero expression at all three time-  
136 points. Cells were passed to UMAP with the following parameters: `n_neighbors=50`, `min_dist=0.25` and  
137 `metric='euclidean'`.

---

### Algorithm 1: Clustering and Visualization

---

**Input:** Data matrix  $\mathbf{X}_{m \times n} = (\mathbf{x}_1, \dots, \mathbf{x}_n) \in \mathbb{R}^{m \times n}$  where  $m$  rows are genes and  $n$  columns are cells.

**Output:** Cell clusters and a low dimensional projection

- 1: Compute the sample mean  $\mu_n$  and the centered matrix  $\mathbf{X}_c = \mathbf{X} - \mu_n \mathbf{1}^\top$  where  $\mathbf{1}$  is a vector of ones
  - 2: Compute the SVD of  $\mathbf{X}_c = \mathbf{U}\Sigma\mathbf{V}^\top$
  - 3: Construct  $\mathbf{P}_{n \times r} = [v_1 \ v_2 \ \dots \ v_r]$  where each column in  $\mathbf{P}$  is a right singular vector of  $\mathbf{X}_c$ . Here  $r$  can be chosen using the optimal hard threshold [21] on  $\mathbf{X}_c$
  - 4: Construct a similarity matrix  $\mathbf{A}_{n \times n}$  from  $\mathbf{P}$  by determining the distance between each row. The choice of distance measure depends on the data type and user preference. Examples include Gaussian similarity, Euclidean distance, Manhattan distance (city block distance), Kullback-Liebler divergence, and correlation
  - 5: Perform clustering: spectral or modularity clustering on  $\mathbf{A}$  with  $k$  clusters.  $k$  can be chosen using domain knowledge or by testing multiple values of  $k$  and evaluating the best performance. Note:  $k$  may be  $\leq r$
  - 6: Visualization: t-SNE or UMAP to reduce the dimensions of  $\mathbf{P}$  and visualize data colored according to clusters
- 

## 138 2.9. scRNA-seq cell type annotation

139 Annotation of cell types after clustering was performed using ranked expression of cell-type specific mouse  
140 marker genes from PanglaoDB [22]. The top 50 most unique marker genes were used for each cell type  
141 sorted by their ubiquitousness index. Each cluster was assigned to a cell type based on the maximum  
142 mean rank of marker genes amongst the differentially expressed genes for that cluster. A small set of 165  
143 CD45<sup>+</sup> cells were also identified that did not align with major immune cell populations; this population was  
144 excluded from subsequent analyses. We performed differential expression analysis on clusters and sorted

145 genes by their Student’s T-Test statistic computed using the `scapny.tl.rank_genes_groups()` function  
146 with `method='t-test'`.

#### 147 2.10. Mapping cell-type signatures to spatial transcriptomics data

148 We used a conditional autoregressive-based deconvolution (CARD) model ([https://github.com/YingMa0107/](https://github.com/YingMa0107/CARD)  
149 `CARD`) to spatially deconvolute cell type signatures of our data and estimate the strength of cell type propor-  
150 tions across tissue capture spots [23]. CARD was chosen over other deconvolution methods for its ability to  
151 leverage nearby spatial information during cell type proportion estimation using a conditional autoregressive  
152 modeling assumption, which imposes spatial correlation structure on the outputs. Briefly, each single cell  
153 was annotated for cell type and scRNA-seq count matrices and spatial transcriptomics count matrices were  
154 structured according to CARD documentation. Deconvolution was performed using `createCARDObject()`  
155 with parameters `minCountGene=10`, and `minCountSpot=20`. Outputs were stored as tabular files for down-  
156 stream analysis. CARD estimates the cell type proportions for  $k$  cell types defined given  $g$  genes at  $n$  tissue  
157 spots using the following non-negative matrix factorization model:

$$\mathbf{X} = \mathbf{B}\mathbf{V}^{\top} + E \quad (1)$$

158 where  $\mathbf{X} \in \mathbb{R}^{g \times n}$  is the spatial transcriptomics data matrix,  $\mathbf{B} \in \mathbb{R}^{g \times k}$  is a matrix of aggregate cell type  
159 signatures derived from the scRNA-seq data,  $\mathbf{V} \in \mathbb{R}^{n \times k}$  is a matrix of cell type proportions at each tissue  
160 spot and  $E \in \mathbb{R}^{g \times n}$  is a normally distributed error matrix. For further details, see [23].

#### 161 2.11. Macrophage continuum analysis

162 A linear model was used to quantify cells along a user-defined continuum as in [24] and [25]. The procedure  
163 from [24] is generalized in Algorithm 2. Briefly, we used Ordinary Least Squares (OLS) to linearize the  
164 correlation between two states of interest in a given cell population, e.g., ATM-LAM or monocyte-LAM. We  
165 quantified each cell’s position relative to the states of interest by computing the distance between the cell  
166 and the each state along the OLS solution. We defined a gene set using DE between the two states with a  
167 Bonferroni correction for multiple-tests to  $\alpha = 0.05$  ( $\hat{\alpha} = 1.65 \times 10^{-6}$ ) and chose top genes for each pole,  
168 ranked by their fold change.

---

**Algorithm 2: Continuum Quantification**

---

**Input:**

1. Two state matrices,  $\mathbf{S}_x \in \mathbb{R}^{n_x \times m}$  and  $\mathbf{S}_y \in \mathbb{R}^{n_y \times m}$  where  $n_x, n_y$  rows are the number of cells in states  $\mathbf{S}_x, \mathbf{S}_y$  respectively and  $m$  columns are genes. Note that  $n_x \neq n_y$ , but  $m$  is assumed to be consistent between  $\mathbf{S}_x$  and  $\mathbf{S}_y$ . The states  $\mathbf{S}_x$  and  $\mathbf{S}_y$  should be chosen as hypothetical poles of a continuum of biological interest.
2. Data matrix  $\mathbf{D} \in \mathbb{R}^{n \times m}$  where the  $n$  rows are cells and the  $m$  columns are the genes, consistent with  $m$  above. Cells in  $\mathbf{D}$  will be quantified along the continuum defined by states  $\mathbf{S}_x$  and  $\mathbf{S}_y$ .

**Output:** Cell continuum values along user-defined axis for cells in  $\mathbf{D}$

1. Define signatures,  $\mathbf{t}_x, \mathbf{t}_y \in \mathbb{R}^m$  for states  $\mathbf{S}_x$  and  $\mathbf{S}_y$ . For example, a function  $f$  aggregating expression of each gene over all cells:

$$\mathbf{t} = (f(\mathbf{S}))_{i=1}^m. \quad (1)$$

2. Define gene-set of interest. For example, select the top  $k$  differentially expressed genes between  $\mathbf{S}_x$ , and  $\mathbf{S}_y$  over  $m$ , ranked by their fold change.
3. Compute the similarity between each cell and the state signatures:  $\mathbf{d}_x = \text{similarity}(\mathbf{D}, \mathbf{t}_x)$  and  $\mathbf{d}_y = \text{similarity}(\mathbf{D}, \mathbf{t}_y)$ . The choice of similarity measure depends on the data and user preference.
4. Determine the continuum axis with respect to  $\mathbf{S}_x$ . For example, using ordinary least-squares (OLS), structure the following minimization problem:

$$\min_{\mathbf{w}} \|\mathbf{X}\mathbf{w} - \mathbf{d}_y\|_2^2, \quad (2)$$

where  $\mathbf{X}_{n \times 2} = (\mathbf{d}_x, \mathbf{1}) \in \mathbb{R}^{n \times 2}$  and  $\mathbf{1}$  is a column vector of ones. The solution to Equation 2 is:

$$\mathbf{w} = (\mathbf{X}^\top \mathbf{X})^{-1} \mathbf{X}^\top \mathbf{d}_y, \quad (3)$$

where  $\mathbf{w}$  is a vector containing the slope  $w_0$  and the intercept  $w_1$  of the line of best fit for the data.

5. Compute the position along the continuum axis for each cell. Let  $\bar{\mathbf{d}}_y$  be the predicted similarity values obtained from the OLS solution. We obtain a vector of positions along the continuum,  $\bar{\mathbf{d}}_y$ , using Equation 4:

$$\bar{\mathbf{d}}_y = \mathbf{X}\mathbf{w} \quad (4)$$

Let the coordinates for each cell along the continuum axis be  $\mathbf{C}_{n \times 2} = (\mathbf{d}_x, \bar{\mathbf{d}}_y) \in \mathbb{R}^2$

6. Compute the distance along the continuum axis for each cell with respect to a reference point,  $\mathbf{p}$ . For example, the reference point may be defined as the cell with the highest similarity to either pole. Let  $\mathbf{p}_{1 \times 2} = (x, y) \in \mathbb{R}^2$ , then the distances,  $\mathbf{h}$ , are defined by

$$\mathbf{h} = \|\mathbf{p} - \mathbf{C}\|_2. \quad (5)$$

For convenience, we rescale distances  $\mathbf{h}$  using:

$$\mathbf{h} = \frac{\mathbf{h} - \min(\mathbf{h})}{\max(\mathbf{h}) - \min(\mathbf{h})} \quad (6)$$


---



## 169 2.12. Ligand-receptor colocalization

170 We obtained mouse ligand-receptor (LR) pairs from [1]. We defined colocalization the simultaneous expres-  
171 sion of ligand,  $l$  and receptor  $r$  at a given tissue-capture spot  $t$ . The colocalization ‘strength’ of  $l$  and  $r$  at  $t$   
172 was quantified using the geometric mean of normalized expression:

$$c(l, r)_t = \sqrt{l_t r_t} \quad (7)$$

173 Where  $l_t$  and  $r_t$  are the expression of  $l$  at  $t$  and  $r$  at  $t$  respectively. By using the geometric mean we ensure  
174 that  $c(l, r) = 0$  where either  $l_t = 0$  or  $r_t = 0$ . LR pairs are said to be colocalized wherever  $c(l, r)_t > 0$ .  
175 Time-dependent colocalization between LR pairs was taken as a necessary, but not sufficient condition in  
176 determining possible signalling pathways. We computed the proportion of spots where  $l$  and  $r$  were localized  
177 and normalized the proportion to 1k spots to account for differences in tissue-section sizes.

## 178 2.13. Construction and analysis of network models

179 We aim to construct a network model that preserves spatial relationships in tissue structure. Let  $\mathbf{G}$  be a  
180 finite, simple, and undirected graph with node set  $V(\mathbf{G}) = \{1, 2, \dots, n\}$  and edge set  $E(\mathbf{G}) \subset V(\mathbf{G}) \times V(\mathbf{G})$ .  
181 Let  $e_{ij}$  be an edge between node  $i$  and node  $j$ . The  $n$  nodes of  $\mathbf{G}$  are chosen from the set of tissue-capture  
182 spots from the spatial transcriptomics data matrix. Thus, each node  $i$  has a specified spatial position in a  
183 2-dimensional Euclidean plane,  $p_i \in \mathbb{R}^2$ . Edges are defined between nodes as a function of (1) their Euclidean  
184 distance and (2) their nodal properties determined by the biological question of interest. In the simplest  
185 case, we may define a radius,  $r$ , which is the maximum physical interaction distance between two nodes. The  
186 strength of the relationship between node  $i$  and node  $j$  is encoded in the edge weight  $w_{ij}$ . Edge weights are  
187 defined by a function,  $f : V(\mathbf{G}) \times V(\mathbf{G}) \rightarrow \mathbb{R}$ .

$$w_{ij} = \begin{cases} f(i, j), & \text{if } \|p_i - p_j\|_2 < r \\ 0, & \text{otherwise.} \end{cases} \quad (8)$$

188 A network defined this way captures the spatial patterning of  $f$  in the local neighborhood constrained by  
189  $r$ . It is also useful to define the weighted adjacency matrix of  $\mathbf{G}$  to be the  $n \times n$  matrix  $\mathbf{A}(\mathbf{G})$  with rows  
190 and columns indexed by  $V(\mathbf{G})$ . We will denote  $\mathbf{A}(\mathbf{G})$  as  $\mathbf{A}$  and the entry  $(i, j)$  of  $\mathbf{A}$  as  $\mathbf{A}(i, j) = a_{ij}$ . The  
191 weighted adjacency matrix may be defined:

$$a_{ij} = \begin{cases} w_{ij}, & \text{if } i \neq j \\ 0, & \text{otherwise.} \end{cases} \quad (9)$$

192 For example, we define LAM-networks based on the harmonic mean of Mac5 CARD estimated proportions  
193 over neighboring tissue spots [23]. In this case, the choice of the harmonic mean is based on the interpretation  
194 of CARD outputs as proportions of the tissue spot explained by a given cell type signature [23]. Let  $m_i$  be  
195 the proportion of Mac5 cell type at tissue spot  $i$ :

$$f(i, j) = \frac{2}{(1/m_i + 1/m_j)} \quad (10)$$

196 The concept of network centrality is motivated by identification of ‘important’ nodes of a network [26]. We  
197 focus on two measures of network centrality: degree centrality (Equation 11) and eigenvector centrality  
198 (Equation 12). Degree centrality is a ‘local’ measure of connectivity whereas eigenvector centrality is a  
199 ‘global’ measure of centrality. Let  $\mathbf{c}_i^d$  denote the degree centrality of node  $i$ . Degree centrality is the sum of  
200 all the edge weights of node  $i$ ,

$$\mathbf{c}_i^d = \frac{1}{n} \sum_{j=1}^n a_{ij}. \quad (11)$$

201 The eigenvector centrality of each node, defined here up to a scale factor, is proportional to the sum of the  
202 eigenvector centralities of its neighbors, that is:

$$\mathbf{c}_i^e = \frac{1}{\lambda} \sum_{j=1}^n a_{i,j} \mathbf{c}_j^e \quad (12)$$

203 where  $\mathbf{c}^e$  is an eigenvector of  $\mathbf{A}$  and  $\lambda$  is the corresponding eigenvalue. The centrality is taken to be an  
204 eigenvector that corresponds to the largest eigenvalue of  $\mathbf{A}$ .

#### 205 2.14. Adipocyte sizing

206 Images of H&E stained adipose tissue (Materials and Methods: [Tissue histology and immunostaining](#))  
207 were analyzed for adipocyte size using the Python package `skimage` [27]. Briefly, images were converted to  
208 greyscale and subjected to an unsharp masking filter with parameters: `amount=75` and `amount=100`. Filtered  
209 images were filtered again using a median filter with default parameterization followed by morphological  
210 reconstruction using `method='erosion'` to enhance contrast between neighboring cells. Finally, images were  
211 filtered using a Gaussian kernel with `sigma=3`. Processed images were thresholded at the 25<sup>th</sup> percentile  
212 before segmentation using the Watershed method. Properties of each segmented cell were obtained using  
213 `measure.regionprops()`. We computed the circularity,  $C$  of all segmentation using Equation 13.

$$C = 4\pi \frac{A}{p^2} \quad (13)$$

214 Where  $A$  is the estimated area and  $p$  is the estimated perimeter of the segmented cell. We filtered regions  
215 with  $0.4 < C < 0.9$  and regions with areas above or below  $2.32\sigma$  from the time-dependant mean.

#### 216 2.15. Histological crown-like structure quantification

217 Tissue images captured during spatial transcriptomics tissue preparation (Materials and Methods: [Spatial](#)  
218 [transcriptomics tissue and library preparation](#)) were analyzed using a segmentation algorithm to classify each  
219 pixel into one of four categories:  $\text{CLS}_{\text{hi}}$ ,  $\text{CLS}_{\text{mid}}$ , Other, and Adipocyte based on 3-channel pixel intensity val-  
220 ues. Briefly, we used the Python package `skimage` to perform Multi-Otsu Thresholding on the 14 week RGB  
221 image tensor [27]. We then extracted basic features using `feature.multiscale_basic_features()` with the  
222 following parameters: `intensity=True`, `edges=False`, `texture=True`, `sigma_min=1`, and `sigma_max=16`. We  
223 developed a Random Forest segmentation model with 50 estimators using the Python package `sklearn`. We  
224 then used the segmentation model to analyze the remaining diet conditions. Regions surrounding spatial  
225 capture spots were segmented, and the proportion of pixels in each category were computed and com-  
226 pared.

## 227 3. RESULTS

### 228 3.1. Dynamic remodeling of adipose tissue is concurrent with glucose intolerance in early obesity

229 Our model of diet-induced obesity included mice fed a normal chow diet (ND) or a 60% high fat diet (HFD)  
230 for 8 or 14 weeks. HFD feeding increased body weight and epididymal white adipose tissue (eWAT) mass as  
231 expected (Figure 1B-D). Mean adipocyte area and frequency of large adipocytes increased at 8 and 14 weeks  
232 (Figure 1G-H, Methods 2.14). Glucose tolerance tests showed increased area under the curve (AUC) starting  
233 at week 1, with the largest AUC and variability at weeks 7 and 8 (Figure 1E-F), suggesting development of  
234 insulin resistance.

### 235 3.2. Single cell profiling

236 It is well established that obesity induces changes in adipose tissue immune cells [10, 8], including accumula-  
237 tion of ATMs that promote metabolic dysfunction [2, 3]. However, the dynamics of these phenotypes remain  
238 incompletely understood. To examine immune cell dynamics in early and chronic obesity we performed  
239 single cell RNA-sequencing (scRNA-seq) on CD45<sup>+</sup> cells from perigonadal (eWAT) fat pads of mice fed ND  
240 or fed a HFD for 8 or 14 weeks (n=4 per cohort).

241 Clustering and annotation of 13,820 single cells identified six broad immune cell populations: monocytes, T  
242 cells, B cells, dendritic cells, adipose tissue macrophages (ATM), and natural killer (NK) cells (Figure 2A),  
243 Methods Section 2.8). Antibody feature barcodes for select surface proteins that were used with scRNA-  
244 seq confirmed immune cell annotations (Figure S3, Methods Section 2.4). Annotations were additionally  
245 confirmed by comparison to cell type-specific gene expression profiles from public databases and published  
246 single cell genomic datasets (Figures S4-S6).

247 Immune cells were then evaluated for changes across diet conditions. ATMs increased as expected with  
248 obesity, comprising 28%, 36%, and 60% of CD45<sup>+</sup> cells in mice fed ND, 8 weeks of HFD, and 14 weeks of  
249 HFD, respectively (Figure 2E, Figure S1A). Dendritic cell and monocyte populations also increased with HFD  
250 feeding, while the T cell population was highest at 8 weeks and decreased by 14 weeks of HFD feeding.

251 Altogether, our data capture expected WAT immune cell population dynamics in obesity progression and  
252 highlight myeloid cell accumulation in chronic obesity.

### 253 3.3. ATM heterogeneity spans five subtypes across early obesity

254 To define ATM heterogeneity, clustering was performed on ATMs from all diet-conditions (Methods Section  
255 2.8). Five ATM subclusters were identified corresponding to resident (Mac1), proinflammatory (Mac2,  
256 Mac3), and lipid-associated (Mac4, Mac5) macrophages (Figure 2C, Methods Section 2.8).

257 Consistent with previous reports, resident ATMs (Mac1) expressed *Lyve1*, *Timd4*, *Mrc1/Cd206*, and *Stab1*  
258 (Figure 2C-E,G and Figure S9) [28, 29, 11].

259 Proinflammatory ATMs (Mac2, Mac3) were identified based on expression of genes encoding proinflammatory  
260 cytokines including *Il1b*, *Tnf* and *Il6* and low expression of efferocytosis markers (*Mertk*, *Axl*, *Cd163*,  
261 *Trem2*). Among proinflammatory ATMs, Mac2 was enriched for additional proinflammatory genes *Tnf*,  
262 *Il1b*, *Ccl2*, *Nlrp3* and the M2 marker *Mrc1* (Cd206). Mac3 had high expression of *Itgax/Cd11c* and antigen  
263 presentation genes (*H2-Ab1*, *H2-Eb1*, *Cd74*) and was low in *Adgre1* (F4/80), suggesting an antigen presenting  
264 ATM similar to [30]. Importantly, Mac3 was low in ATDC markers including *Zbtb46*, *Clec9a*, and *Cd24a*  
265 (Figure S10) [11]. Taken together, these data indicate the presence of proinflammatory macrophages that  
266 participate in monocyte recruitment and activation of T cells.

267 Finally, Mac4 and Mac5 ATMs emerged with HFD feeding and expressed genes consistent with lipid-  
268 associated macrophages (LAM) including *Trem2*, *Cd9*, and *GpnmB* (Figure 2G) [10]. Despite transcriptional  
269 similarities, Mac4 and Mac5 differed in magnitude of LAM marker expression (Figure S8, Figure 2G).

270 Overall, these data highlight an increase in ATM diversity with HFD feeding.

### 271 3.4. Lipid-associated ATMs overtake proinflammatory ATMs in chronic obesity

272 Next, we examined ATM phenotype dynamics during HFD feeding. To assess broad changes in the ATM tran-  
273 scriptional program, we examined expression of gene sets associated with phenotypic shifts in macrophages.

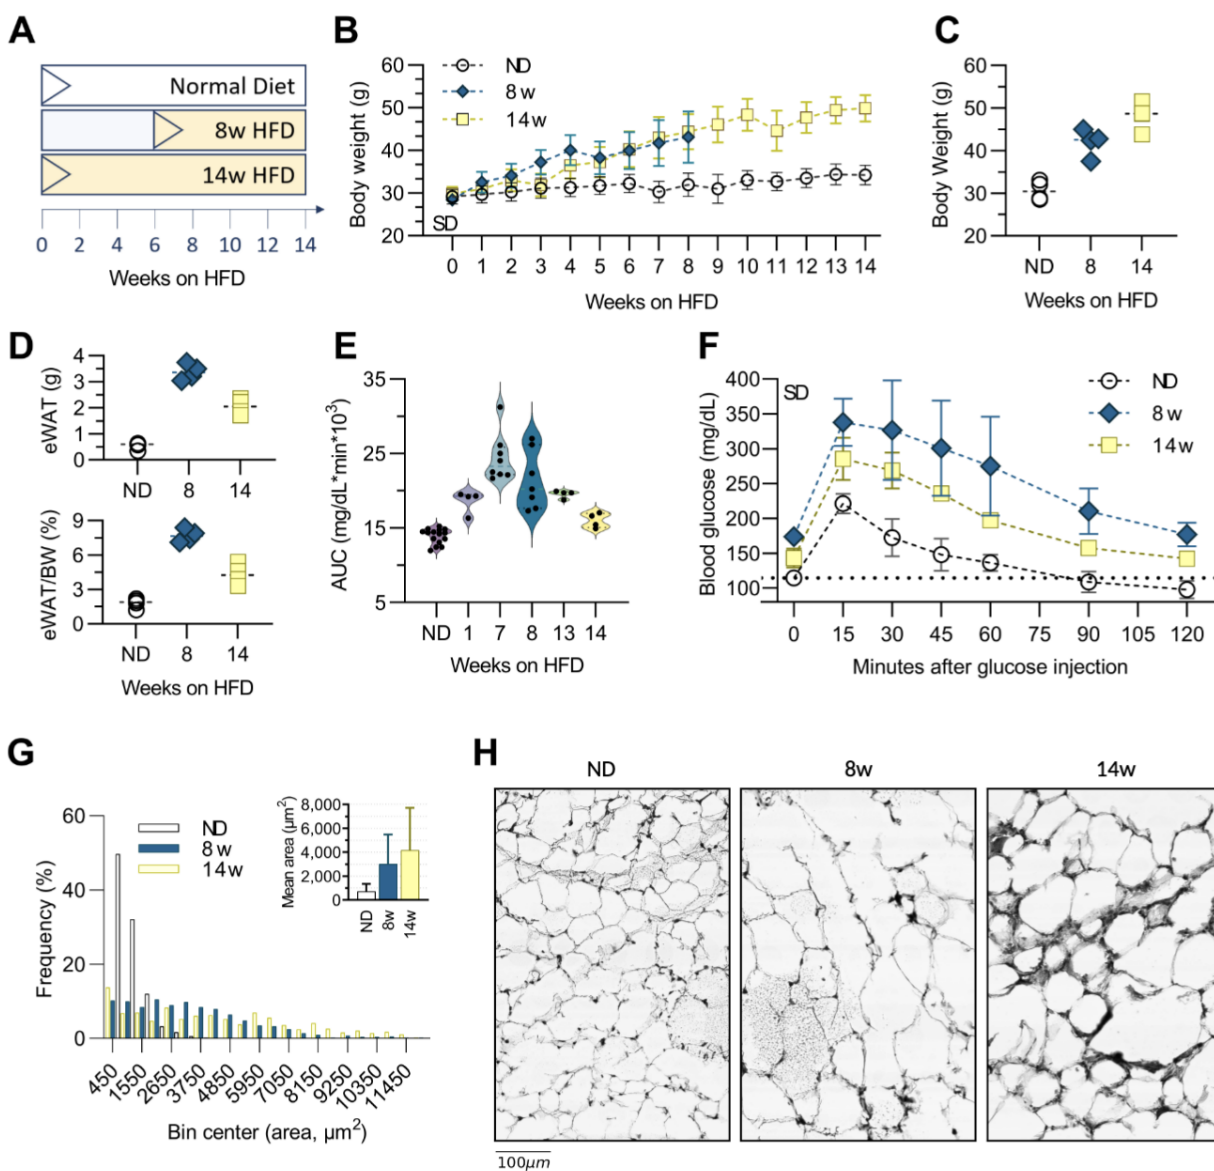

**Figure 1: Diet-induced obesity and adipose tissue remodeling.** (A) Time course for mice fed a 60% high-fat diet (HFD) for 8 weeks (8w) or 14 weeks (14w), versus normal diet (ND) controls. (B) Total body weight by week on HFD. (C) Final body weight at time of tissue collection. (D) Epididymal adipose tissue (eWAT) weight (top) and eWAT as a percentage of body weight (bottom). (E) Glucose tolerance test data showing area under the curve (AUC). (F) Glucose measurements for cohorts one week prior to endpoint tissue collection. (G) Frequency distribution and average adipocyte size in eWAT of ND, 8w, and 14w cohorts. (H) H&E images of adipose tissue sections at ND, 8 and 14 weeks on HFD.

274 ATMs showed progressively increased gene expression related to lipid metabolism, migration, catabolism, and  
 275 cell death (Figure 2B), supporting altered metabolism and survival processes in response to obesity.

276 We found that resident ATMs maintained a stable population over the course of HFD feeding (Figure 2C-  
 277 E). Proinflammatory macrophages were present in lean eWAT through 8w of HFD feeding but decreased  
 278 substantially after 14w of HFD feeding (Figure 2C-E). In contrast, LAMs emerged with HFD feeding and  
 279 continued to accumulate in chronic obesity (Figure 2C-E).

280 Given that other immune cells also have imbalanced subtypes in obesity and to provide additional context

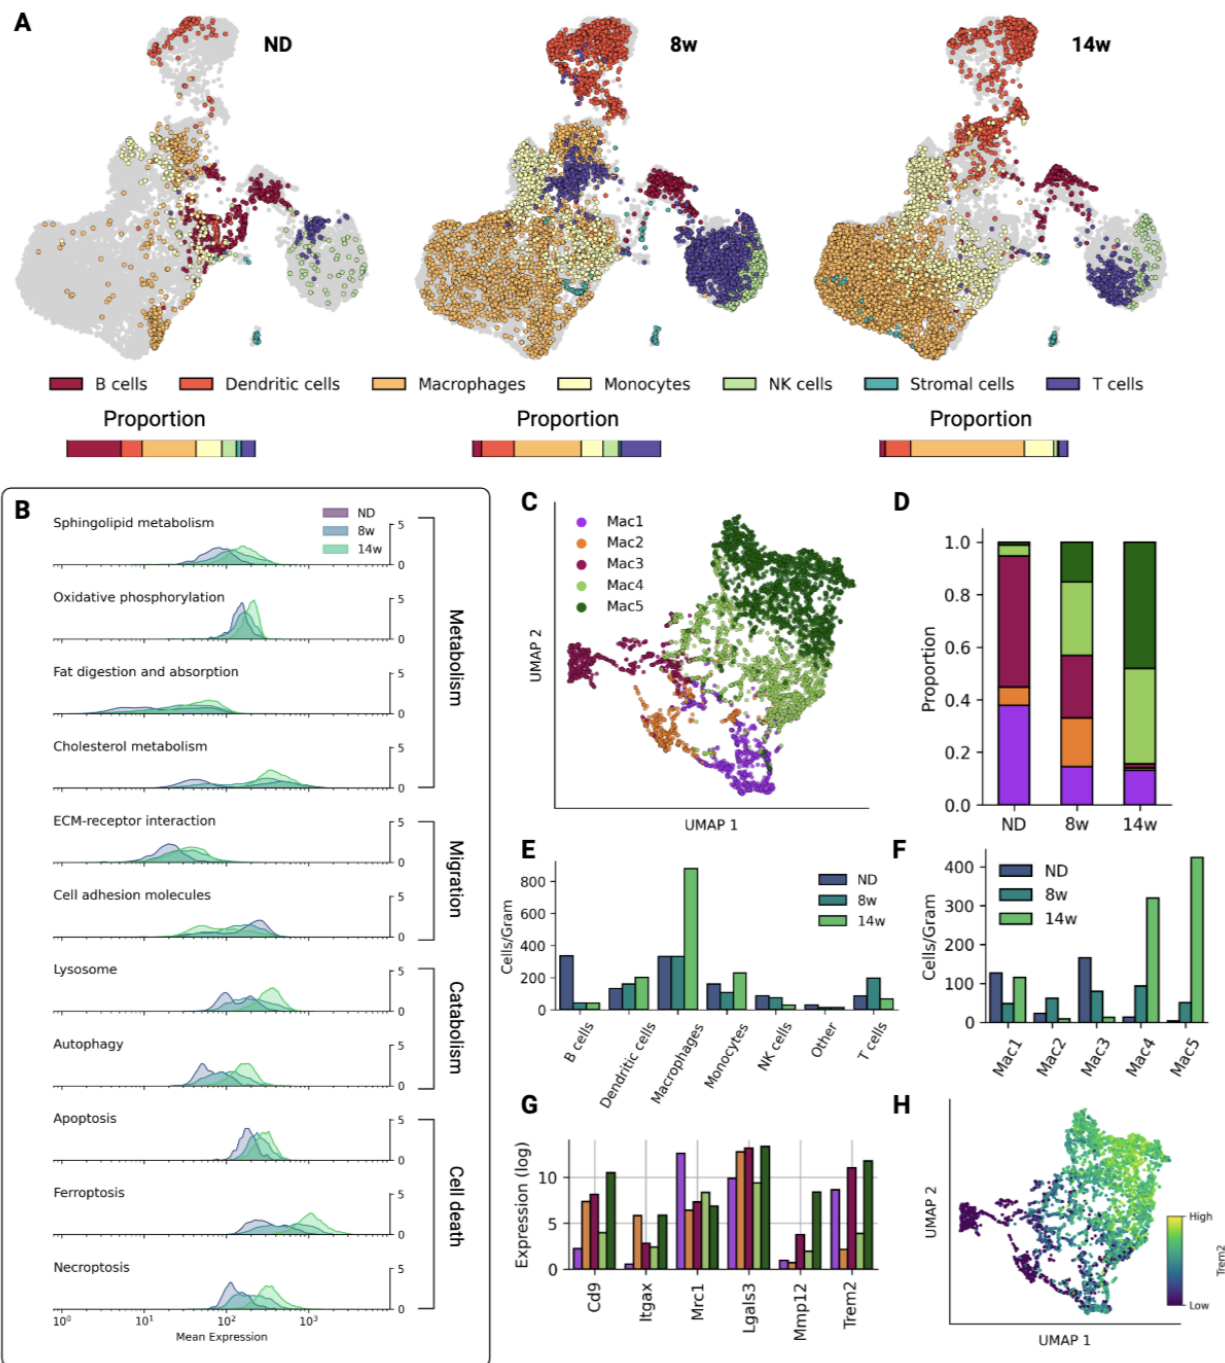

Figure 2: **Single cell data on macrophage phenotypes in obesity.** (A) immune cell population changes over the course of diet-induced obesity. (B) Changes in expression in expression of genes in select KEGG pathways in the macrophage subpopulation. (C) UMAP visualization of ATM clusters from scRNA-seq data. (D) Proportions of each ATM cluster at each time point. (E) The number of cells per gram of adipose tissue for each cell type in each diet-condition. (F) ATMs subtypes per gram per cohort. (G) Expression of key genes across ATM clusters. (H) *Trem2* expression in ATMs.

281 for ATM phenotypes during the time course, we further analyzed the single cell data for subtypes of T cells,  
 282 monocytes, and dendritic cells. Known subtypes that change in adipose tissue with obesity were identified

283 including decreased regulatory T cells and increased conventional T cells and type 2 conventional dendritic  
284 cells (Figure S7) [10, 11].

285 Taken together, these data show that while proinflammatory ATMs increase during adipose tissue hypertro-  
286 phy, LAMs become the most prominent ATM subtype in chronic obesity.

### 287 3.5. LAM subtypes form a monocytic lineage

288 We observed that between Trem2<sup>+</sup> LAMs, Mac4 outnumbered Mac5 at 8w (Figure 2D, F), but Mac5 were  
289 higher at 14w of HFD feeding (Figure 2D, F). Since LAMs are reported to be monocyte-derived [10], we  
290 hypothesized that cells in the Mac4 cluster were in transition along a monocyte-LAM lineage. Examining  
291 DE genes, 287 distinguished Mac4 and monocytes, while 834 distinguished Mac5 and monocytes (Figure  
292 S5), suggesting increasing divergence across monocytes, Mac4, and Mac5. We then queried monocytes,  
293 Mac4, and Mac5 for expression of genes related to monocyte differentiation and macrophage maturity. The  
294 monocytes markers *Cx3cr1* and *Ly6c2* were decreased in the Mac4 cluster, but were consistently higher in  
295 Mac4 compared to Mac5 (Figure 3A). Cells the Mac4 cluster also showed intermediate expression of LAM  
296 marker genes *Lgals3*, *Trem2* and *Ctsl* (Figure 3B). Mac4 also expressed *Ms4a7*, a marker of monocyte-  
297 macrophage differentiation, more highly than both monocytes and Mac5 [31].

298 To further examine the hypothesis that Mac4 cells are pre-LAMs, we correlated them with resident ATMs  
299 (Mac1 in ND), monocytes, and chronic obesity LAMs (Mac5 in 14w). We found that Mac4 cells have  
300 intermediate correlation with the LAM and monocyte signatures, but low correlation with the resident ATM  
301 signature (Figure 3C).

302 Taken together, our data support that Mac4 cells are recently differentiated macrophages that are in process  
303 of acquiring the LAM phenotype.

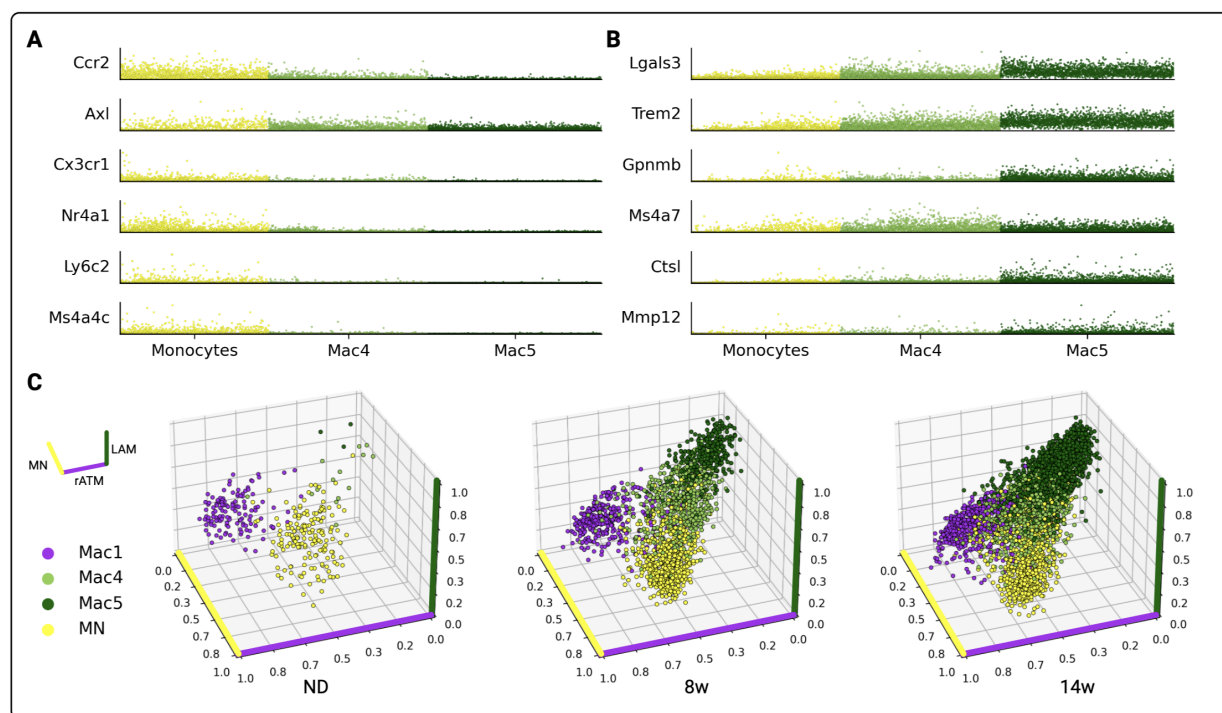

Figure 3: **Emergence of the LAM phenotype.** (A) Normalized expression of monocyte marker genes for key myeloid cell types. (B) Normalized expression of LAM marker genes for key myeloid cell types. (C) Three-dimensional profiling of monocytes, resident ATMs (Mac1), and LAMs (Mac4/Mac5). Cell position represents simultaneous correlation with gene expression signatures derived from monocytes (MN, yellow axis), resident ATMs (rATM, purple axis), and LAMs (green axis).

### 304 3.6. Spatial transcriptomics captures LAM dynamics in obesity

305 The spatial context of ATM reprogramming within WAT remains poorly understood. Thus, to establish  
306 the spatial dynamics of LAM emergence with obesity, we performed spatial transcriptomics (Methods 2.5)  
307 on eWAT sampled from mice fed ND or fed a HFD for 8 or 14 weeks. We analyzed a total of 7,424 tissue  
308 capture spots across diet conditions.

309 Immune cell transcriptome profiles were mapped onto tissue-specific locations using conditional autoregressive-  
310 based deconvolution (CARD) (Methods 2.10) [23, 32]. We found strong emergence of the LAM phenotype  
311 across tissue spots in chronic obesity, consistent with our single cell data (Figures 4A-B, 5B, Figures S12A-  
312 B). Monocytes also increased in spatial transcriptomics data in early obesity (Figures 4A-B, 5B, Figures  
313 S12A-B). While pre-LAM spots were highest in early obesity, LAM spots were highest in chronic obesity  
314 (Figure S12B). Further, pre-LAMs and LAMs were highly spatially correlated at 8w ( $r = 0.6$ ) but not at  
315 14w ( $r = 0.2$ ) (Figure S14), suggesting that LAM dynamics are spatially coordinated. Taken together, these  
316 results support LAM accumulation in WAT via differentiation from circulating monocytes.

### 317 3.7. LAM networks are hubs of cell death

318 LAMs are associated with development of ‘crown-like structures’ (CLS), which are in turn correlated with  
319 development of insulin resistance [33, 34, 14]. CLS are well-studied [9, 35], though a spatio-temporal under-  
320 standing of the drivers of CLS formation is lacking. We observed CLS as early as 8w, which prompted us  
321 to characterize the transcript patterns associated with early CLS formation. We developed cell type-specific  
322 network models based on spatial gene expression patterns and used the models to understand the dynamics  
323 of adipose tissue organization in obesity (Figure 5A, Methods 2.13).

324 Network models represent local tissue regions where a given cell type is highly localized. In the models,  
325 nodes represent tissue capture spots and edges represent interactions between adjacent nodes. Edges were  
326 defined by the harmonic mean of CARD-predicted proportions between all adjacent pairs of nodes for a  
327 given cell type (Methods 2.13). The structural properties of the cell type networks were quantified using  
328 graph-theoretic measures, which in turn revealed properties of tissue organization (Figure 5A, Methods 2.13)  
329 [26].

330 Network models showed higher local concentrations of adaptive immune cells (B cells, T cells) in week 8 than  
331 in lean tissue or week 14, which coincided with the emergence of proinflammatory ATMs (Figure 5E). In  
332 addition, proinflammatory Mac3 had high spatial correlation with T cells at 8w ( $r = 0.6$ ) (Figure S14). These  
333 results suggest T cell activation, which is supported by the emergence of T conv at 8w (Figure S7).

334 In contrast, local LAM concentrations increased monotonically over the course of HFD feeding, further sup-  
335 porting that ATM reprogramming toward the LAM phenotype is spatially coordinated. To further investigate  
336 LAM spatial patterning, we randomly sampled tissue spots from all three diet conditions and constructed  
337 150-node networks around the sampled spot (Figure 5C). As expected, high local LAM concentrations were  
338 absent in lean tissue (Figure 5C, E). With HFD feeding, LAM concentration increased (Figure 5C, Figure  
339 S16). We then performed differential expression analysis between regions of high and low LAM concentra-  
340 tions and found that regions of high LAM concentrations were enriched in genes related to phagocytosis,  
341 autophagy, and cell death including *Ctsl*, *Ctss*, *Lamp1*, *Ctsd*, and *Ctsb* (Figure 5D). Altogether, these results  
342 identify spatially coordinated accumulation of LAMs that are engaged in clearance of excess lipids and dead  
343 adipocytes.

### 344 3.8. LAM networks map onto histologically identified CLS

345 CLS are defined by an accumulation of fibrotic and necrotic material from dead or dying adipocytes and  
346 ATMs [35, 9]. To determine the degree to which the LAM network was spatially aligned with CLS, we first  
347 developed an image segmentation algorithm to classify CLS regions from H&E images captured in parallel  
348 with spatial transcriptomics data (Figure 6A, Methods 2.14). The algorithm identified CLS<sub>hi</sub> and CLS<sub>mid</sub>  
349 regions of fibrotic and necrotic material that increased with obesity (Figure 6B). In contrast, area identified  
350 as adipocytes was largest in week 8 and decreased in week 14 (Figure 6C), which is consistent with adipocyte  
351 expansion in early obesity. We then aligned CLS regions with spatial transcriptomics data and found that  
352 significant colocalization of LAMs with CLS in both early and chronic obesity (Figure 6D). In contrast,  
353 pre-LAMs colocalized with CLS regions only in early obesity (Figure 4, Figure S12).

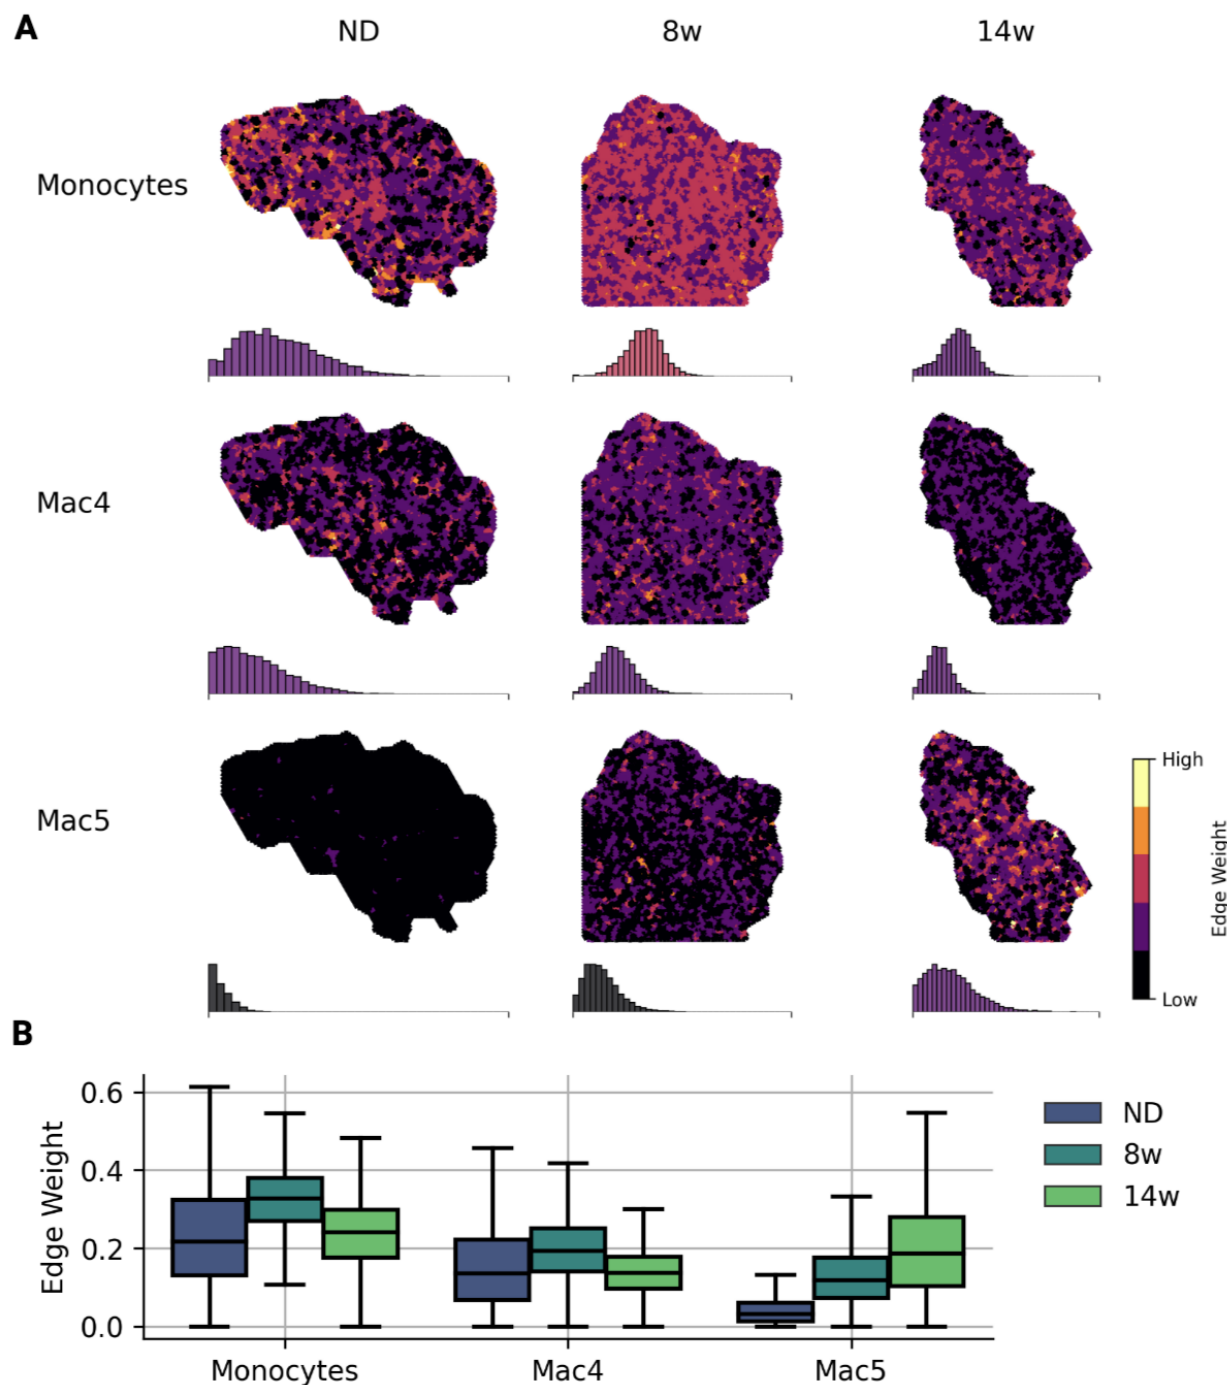

Figure 4: **Spatial patterning of the monocyte-LAM lineage.** (A) Spatial patterning of monocytes, pre-LAMs (Mac4) and LAMs (Mac5) over the course of HFD feeding. Edge weights are the harmonic mean of CARD proportions for neighboring capture spots. Histograms show the distribution of edge weights for the whole tissue section and are colored according to the mean edge weight on the same color scale. (B) Edge weight distribution by cell type and diet condition.

354 Beyond correlation, we sought to characterize the physical organization of immune cell types within WAT  
355 and their relationship to CLS. We used eigenvector centrality, a global measure of nodal importance in a



356 network, to quantify cell type-specific structure within the tissue [26]. We then correlated per-spot centrality  
357 for each immune cell type network with per-spot CLS prevalence (Figure 6G). We found that critical hubs  
358 of innate immune cells aligned with early CLS in week 8 (Figure 6G). Central nodes in pre-LAM and LAM  
359 networks aligned with CLS both in early and chronic obesity (Figure 6E-G). In contrast, adaptive immune  
360 cell types (B cells, T cells) exhibited negative correlation with CLS in all diet conditions.

361 Taken together, these results capture the dynamic, large-scale reorganization of immune cells in early obesity  
362 and the spatial concentration of LAMs in CLS regions in chronic obesity.

### 363 3.9. Myeloid signaling shapes nascent CLS

364 Given the early presence of CLS and reorganization of myeloid cell types in week 8, we sought to characterize  
365 intracellular signaling during formation of CLS. We therefore quantified spatially colocalized expression of  
366 ligand-receptor (LR) pairs throughout WAT and within the monocyte-LAM lineage.

367 We first cataloged tissue-wide changes in LR expression. We identified the LR pairs that increased in early  
368 obesity and chronic obesity (Figure 7A-B) and the LR pairs that decreased in early and chronic obesity  
369 ((Figure 7C-D, Methods 2.12). As expected, global LR analysis revealed increased metabolic activation  
370 (*Lrp1*, *Lpl*, *App*, *ApoE*), regulation of cellular migration (*Adipoq*, *Igf1*, *Thbs1*, *ApoE*), regulation of tissue  
371 remodeling (*Col1a1*, *Col1a2*) and regulation of immune response (*Cd36*, *Cd81*, *C3*) (Figure 7A-D, Figure S15)  
372 as predominant biological processes associated with obesity-induced WAT remodeling.

373 To identify the myeloid-specific signaling that may contribute to the emergence of CLS, we investigated LR  
374 pairs that were both differentially expressed in a myeloid cell subtype and colocalized with one another in  
375 the spatial transcriptomics data (Figure 7E, Methods 2.12). Pre-LAMs expressed multiple ligands for LAM  
376 receptor *Lrp1*, including *App*, *Plau*, *Lpl*, *ApoE*, *Calr* and *C1qb*. Additionally, pre-LAMs expressed ligands  
377 *App*, *Plau*, *ApoE* that had multiple receptors throughout the monocyte-LAM lineage.

378 Thus, we identify a novel set of signaling molecules expressed in early obesity along the monocyte-LAM  
379 lineage that may significantly influence the nascent CLS microenvironment.

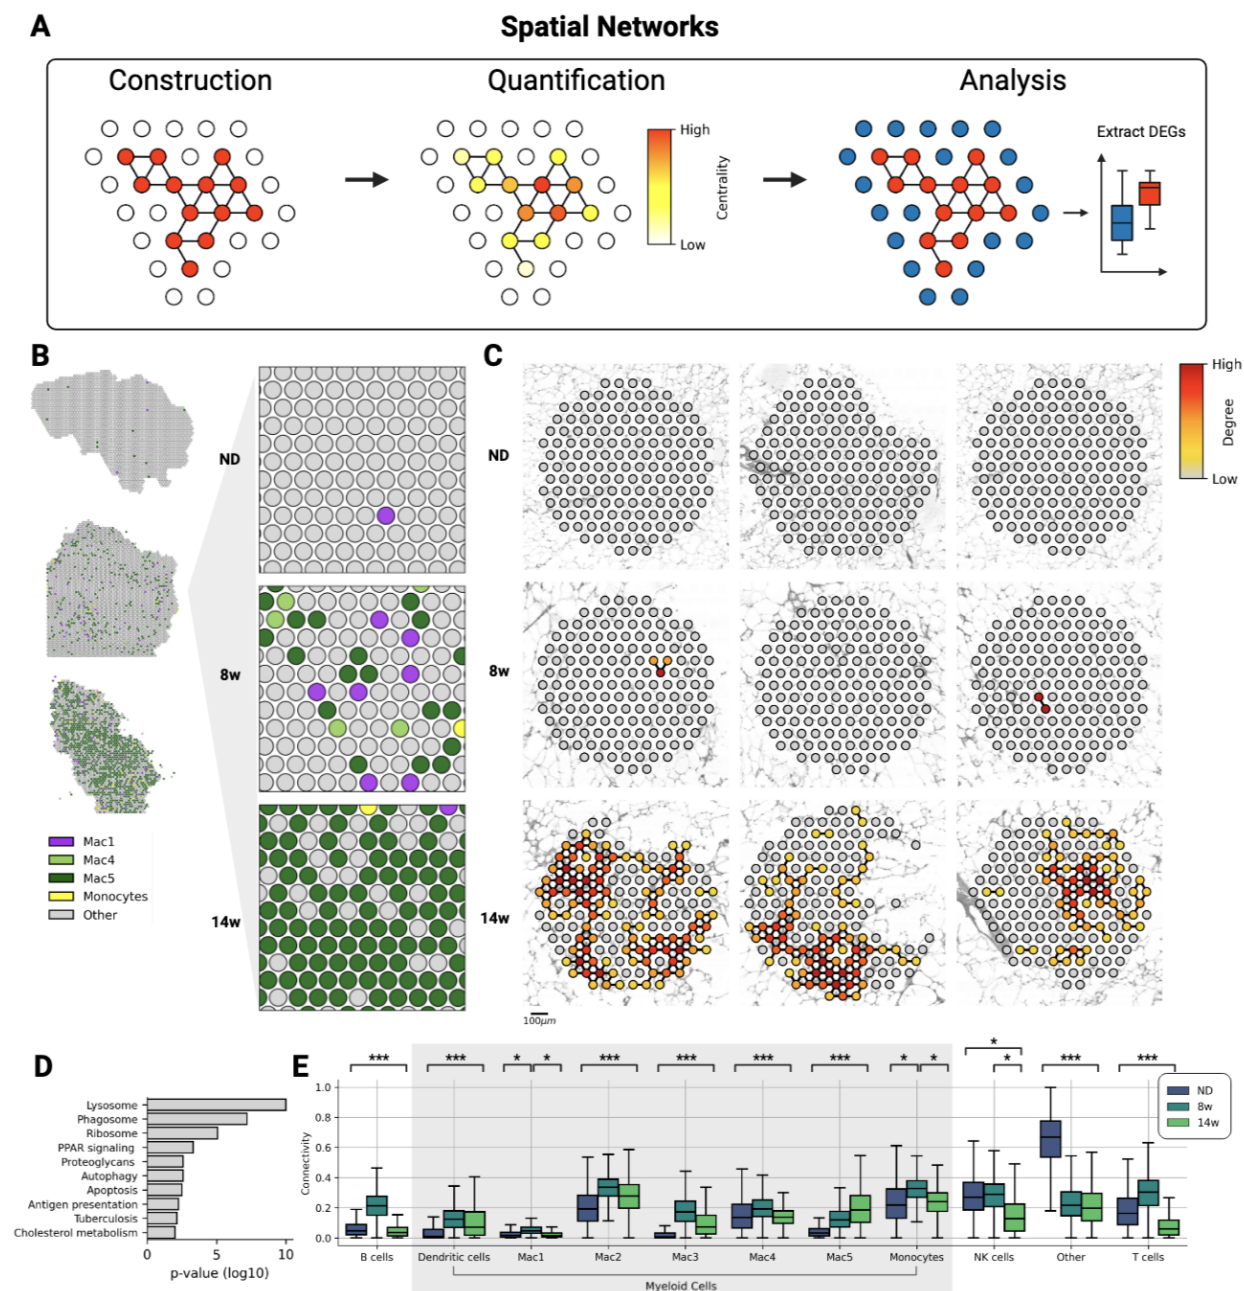

Figure 5: **LAM networks and Hubs of Cell Death.** (A) Workflow schematic. Network models are defined based on properties of neighboring tissue-spots. Analysis of network structure reveals principals of tissue organization. Differential expression analysis may be used to characterize the transcriptional signature of niches. (B) CARD-predicted cell type proportions for myeloid cell types over the course of HFD feeding. (C) Nine randomly sampled 150-node networks based on LAM signature (Mac5) over time. (D) Top 10 KEGG pathways for differentially expressed genes from LAM networks at 8 weeks and 14 weeks, compared to neighboring spatial capture spots. (E) Connectivity of tissue-wide networks for all immune cell types over time. Connectivity is the distribution of network edge weights, defined as harmonic mean of CARD predicted proportions between neighboring spots. Three asterisks denote that comparison between each time point (ND vs. 8w, 8w vs. 14w and ND vs. 14w) was significant ( $\alpha = 0.05$ ); a single asterisk denotes that the specific comparison was significant ( $\alpha = 0.05$ ).

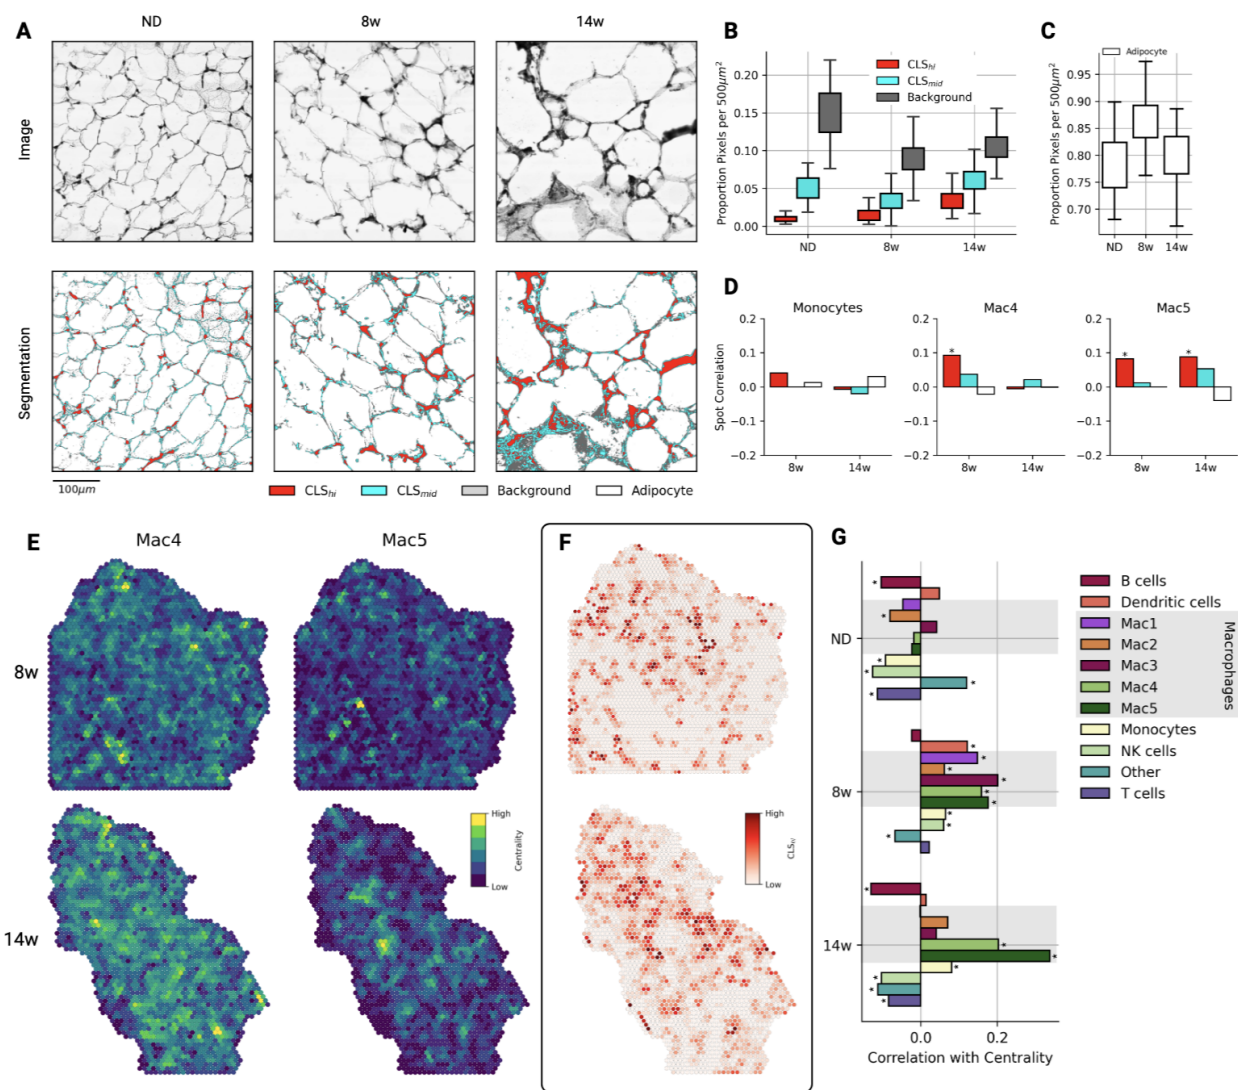

**Figure 6: Histological Quantification of Crown-Like Structures (CLS).** (A) H&E images captured during spatial transcriptomics library preparation (top) and segmentation results quantifying crown-like structures (bottom). (B) Segmentation class label proportions of 100 randomly sampled 500 $\mu$ m regions from each diet condition. (C) Adipocyte area from images regions in (B). (D) Spot correlation between myeloid cell type proportions and segmentation results from a 150 $\mu$ m region around each capture spot. Asterisks denote significant Pearson correlation values ( $\alpha = 0.01$ ). (E) Spot importance in global cell type networks (eigenvector centrality) in HFD feeding conditions. Eigenvector centrality highlights regions of densely localized cells in the tissue. (F) CLS<sub>hi</sub> segmentation results in 150 $\mu$ m regions around each capture spot at 8 and 14 weeks. (G) Spot correlation between CLS<sub>hi</sub> segmentation results and eigenvector centrality for each diet-condition, by cell type. Asterisks denote significant Pearson correlation values ( $\alpha = 0.01$ ).

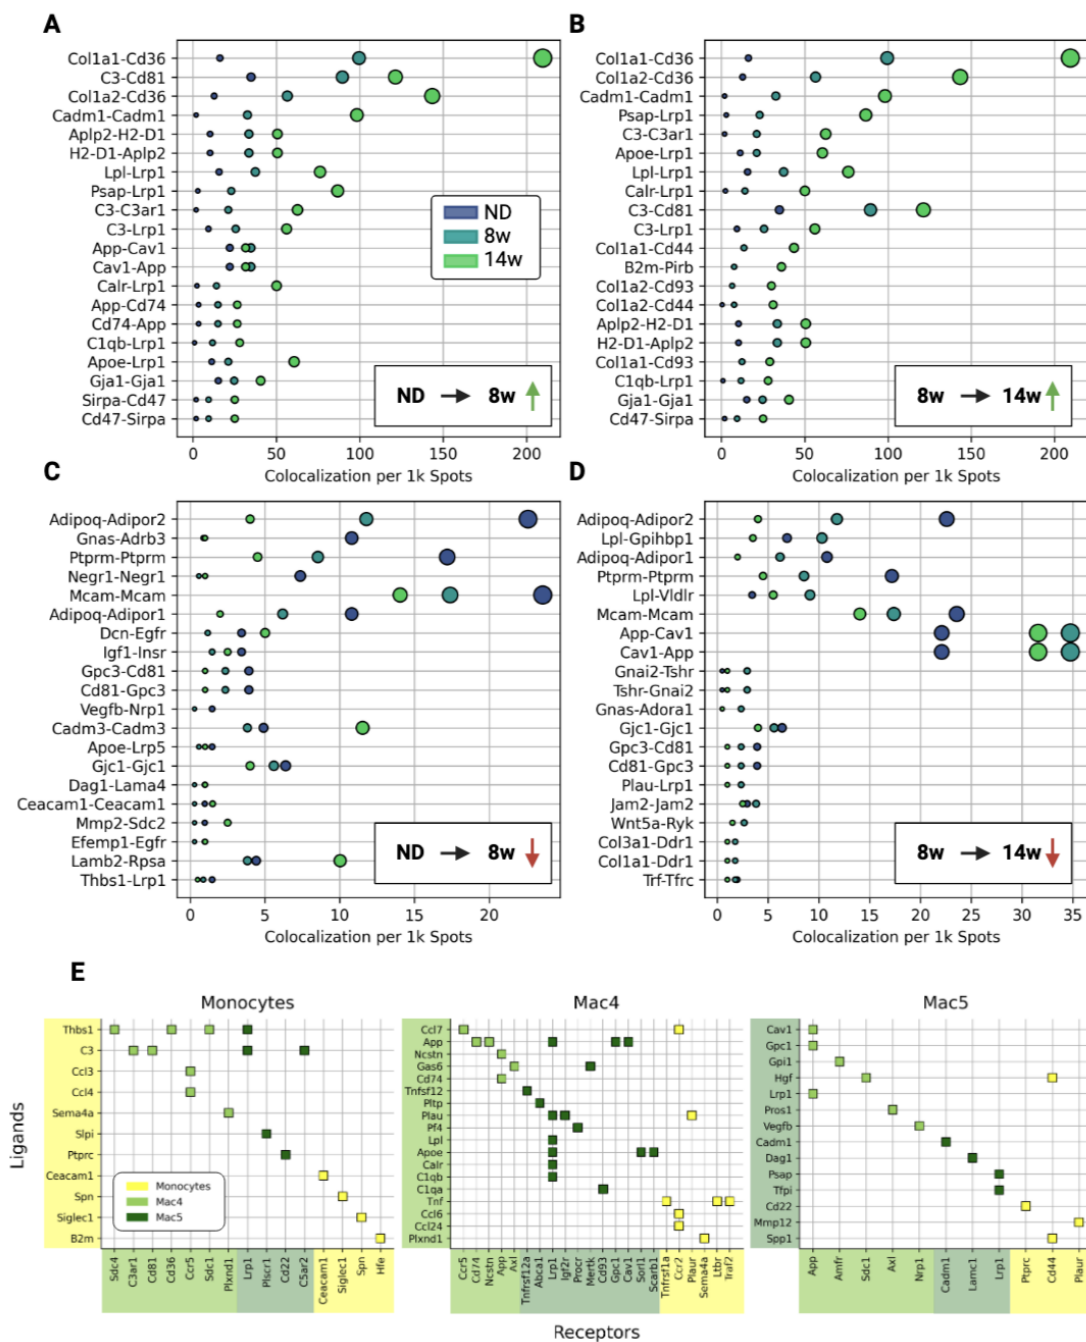

Figure 7: **WAT ligand-receptor signaling dynamics.** (A) Ligand-receptor (LR) pairs with most increased colocalization during the first 8 weeks of HFD feeding. Dot sizes are LR colocalization per 1k capture spots (same as x-axis) and dot colors indicate diet-condition. (B) LR pairs with most increased colocalization during the last 6 weeks of HFD feeding. (C) LR pairs with most decreased colocalization during the first 8 weeks of HFD feeding. (D) LR pairs with most decreased colocalization during last 6 weeks of HFD feeding. (E) Differential expressed myeloid LR pairs with non-zero colocalization in spatial data.

## 380 4. DISCUSSION

381 Changes in mammalian adipose tissue immune cells persist even in weight loss [15, 12], highlighting the  
382 need to better understand mechanisms that promote adipose tissue dysfunction. Our study elucidates ATM  
383 phenotype dynamics in their spatial context in early and chronic obesity by combining single cell RNA-seq,  
384 spatial transcriptomics, and imaging over time.

385 Our work supports increased phenotypic diversity in ATMs with obesity that is consistent with other single  
386 cell work [10, 24, 35, 11]. Our data captured the dramatic increase in ATMs that were phenotypically  
387 distinct from resident ATMs in lean tissue (Figure 3H), and ATMs overall showed metabolic and catabolic  
388 activation in obesity (Figure 3A). We also show that the LAM phenotype became dominant among ATMs  
389 in chronic obesity [10, 8, 14] 3B-G). These data are consistent with other work demonstrating that ATMs  
390 acquire non-classical activation states in obesity [36, 37, 14, 24].

391 LAMs are reported to be anti-inflammatory, tissue-remodeling macrophages that are highly metabolically  
392 active; their transcriptional signature is associated with phagocytosis and endocytosis [13] and they have  
393 elevated expression of markers such as *Trem2*, *Lgals3* and *Ctsl* [10]. Our data agree with these findings and  
394 additionally identify a novel population of pre-LAMs as a closely related precursor to LAMs (Figure 3H).  
395 Significant appearance of pre-LAMs precedes accumulation of LAMs and coincides with initial formation of  
396 CLS. Spatial analyses further support pre-LAM localization to CLS in early obesity and suggest pre-LAM  
397 signaling through *App*, *ApoE*, *Lpl*, and *Lrp1* as drivers of CLS formation.

398 These molecules implicate disruption of lipid processing pathways in development of tissue dysfunction. Dys-  
399 regulated lipid processing is associated with oxidative and ER stress that alters cell survival and macrophage  
400 phenotype [38, 39, 40, 41], which are in turn hallmarks of disease progression in type II diabetes and neuro-  
401 logical disorders [42, 41].

402 Limitations of this study include low cell numbers in our single cell data (1.2k-6.4k cells), which limits  
403 identification of rare but functionally important cell types. Although we identified multiple ATM subtypes,  
404 other immune cell subtypes were less identifiable, potentiality due to low cell numbers. Known shifts in  
405 subtypes include increased CD8<sup>+</sup> T effector and CD4<sup>+</sup> T<sub>H</sub>1 cells and decreased regulatory T cells in obesity  
406 [43, 44, 45]. In addition, spatial transcriptomics data included only one tissue section per diet condition  
407 and were relatively low depth with a median of 91-173 genes identified per capture spot. We therefore used  
408 nearby capture spots to improve cell type identification at each spot used nearby capture spots to infer cell  
409 type proportions at each capture spot [23]. Finally, data were only collected from male mice which limits  
410 comparisons based on sex.

### 411 Conclusions

412 Our data revise current understanding of ATM phenotypic shifts in obesity. We identify important mile-  
413 stones in monocyte-LAM development and provide spatial context for myeloid signaling that is implicated  
414 in metabolic dysfunction. Our study provides novel clarity on the cell types and signaling involved in CLS  
415 formation and accumulation, including the spatial dynamics of lipid-associated macrophage development in  
416 obesity.

#### 417 **Author contributions**

418 **Cooper Stansbury:** Methodology, software, formal analysis, data curation, writing and editing the manuscript,  
419 visualization; **Gabrielle A. Dotson:** Methodology, software, formal analysis, data curation, writing and  
420 editing the manuscript, visualization; **Harrison Pugh:** methodology, formal analysis, and writing and edit-  
421 ing the manuscript; **Alnawaz Rehemtulla:** methodology, resources, writing and editing the manuscript;  
422 **Indika Rajapakse:** methodology, resources, writing and editing the manuscript, supervision; **Lindsey A.**  
423 **Muir:** conceptualization, methodology, investigation, formal analysis, resources, writing and editing the  
424 manuscript, visualization, supervision.

#### 425 **Funding**

426 Research reported in this publication was supported by the National Science Foundation (NFS) under award  
427 number 2225568 to IR, the University of Michigan NIH NIGMS Bioinformatics Training Grant under Award  
428 Number 5T32GM070449-15 and the University of Michigan Genome Science Training Program (GSTP)  
429 Fellowship funded by NHGRI under Award Number 5T32HG000040-27 to GAD, the Air Force Office of  
430 Scientific Research (AFOSR) award FA9550-18-1-0028 to IR, the National Institute Of Diabetes And Di-  
431 gestive And Kidney Diseases of the National Institutes of Health under Award Numbers K01DK116928 and  
432 R03DK129636 to LAM, and the National Cancer Institute of the National Institutes of Health under Award  
433 Number P30CA046592 by use of the Rogel Cancer Center Single Cell Resource. The content is solely the  
434 responsibility of the authors and does not necessarily represent the official views of the National Institutes  
435 of Health.

#### 436 **Acknowledgements**

437 We thank Ingrid Bergin and Pavlina Zafirovska for technical assistance in sectioning and staining tissues,  
438 Olivia Koues and the University of Michigan Advanced Genomics Core, Evan Keller and Greg Shelley  
439 for assistance with single cell sequencing, Abigail Riesmeyer and Siva Kumar for technical assistance, and  
440 Stephen Lindsly and Can Chen for their input on data analysis. We also acknowledge BioRender, which was  
441 used to generate all figures.

#### 442 **Declarations of interest**

443 The authors report no conflicts of interest in this work.

#### 444 **Data and resource availability**

445 The spatial transcriptomics and single-cell RNA-seq datasets generated in this study have been deposited  
446 to the Gene Expression Omnibus (GEO) and can be accessed via accession number GSE198012.

## 447 References

- 448 [1] Chiara Baccin, Jude Al-Sabah, Lars Velten, Patrick M. Helbling, Florian Grünschläger, Pablo  
449 Hernández-Malmierca, César Nombela-Arrieta, Lars M. Steinmetz, Andreas Trumpp, and Simon Haas.  
450 Combined single-cell and spatial transcriptomics reveal the molecular, cellular and spatial bone marrow  
451 niche organization. *Nature Cell Biology*, 22(1):38–48, January 2020. Number: 1 Publisher: Nature  
452 Publishing Group.
- 453 [2] Carey N Lumeng, Stephanie M DeYoung, Jennifer L Bodzin, and Alan R Saltiel. Increased inflammatory  
454 properties of adipose tissue macrophages recruited during diet-induced obesity. *Diabetes*, 56(1):16–23,  
455 2007.
- 456 [3] Carey N Lumeng, Jennifer B DelProposto, Daniel J Westcott, and Alan R Saltiel. Phenotypic switching  
457 of adipose tissue macrophages with obesity is generated by spatiotemporal differences in macrophage  
458 subtypes. *Diabetes*, 57(12):3239–3246, 2008.
- 459 [4] Lindsey A Muir, Samadhi Kiridena, Cameron Griffin, Jennifer B DelProposto, Lynn Geletka, Gabriel  
460 Martinez-Santibañez, Brian F Zamarron, Hannah Lucas, Kanakadurga Singer, Robert W O'Rourke,  
461 et al. Frontline science: Rapid adipose tissue expansion triggers unique proliferation and lipid accumu-  
462 lation profiles in adipose tissue macrophages. *Journal of leukocyte biology*, 103(4):615–628, 2018.
- 463 [5] Lindsey A Muir, Kae Won Cho, Lynn M Geletka, Nicki A Baker, Carmen G Flesher, Anne P Ehlers,  
464 Niko Kaciroti, Stephen Lindsly, Scott Ronquist, Indika Rajapakse, et al. Human cd206+ macrophages  
465 associate with diabetes and adipose tissue lymphoid clusters. *JCI insight*, 2022.
- 466 [6] Jesper Bäckdahl, Lovisa Franzén, Lucas Massier, Qian Li, Jutta Jalkanen, Hui Gao, Alma Andersson,  
467 Nayanika Bhalla, Anders Thorell, Mikael Rydén, et al. Spatial mapping reveals human adipocyte  
468 subpopulations with distinct sensitivities to insulin. *Cell metabolism*, 33(9):1869–1882, 2021.
- 469 [7] Saverio Cinti, Grant Mitchell, Giorgio Barbatelli, Incoronata Murano, Enzo Ceresi, Emanuela Faloia,  
470 Shupe Wang, Melanie Fortier, Andrew S. Greenberg, and Martin S. Obin. Adipocyte death defines  
471 macrophage localization and function in adipose tissue of obese mice and humans. *Journal of Lipid*  
472 *Research*, 46(11):2347–2355, November 2005. Publisher: Elsevier.
- 473 [8] Margo P. Emont, Christopher Jacobs, Adam L. Essene, Deepti Pant, Danielle Tenen, Georgia Colleluori,  
474 Angelica Di Vincenzo, Anja M. Jørgensen, Hesam Dashti, Adam Stefek, Elizabeth McGonagle, Sophie  
475 Strobel, Samantha Laber, Saaket Agrawal, Gregory P. Westcott, Amrita Kar, Molly L. Veregge, Anton  
476 Gulko, Harini Srinivasan, Zachary Kramer, Eleanna De Filippis, Erin Merkel, Jennifer Ducie, Christo-  
477 pher G. Boyd, William Gourash, Anita Courcoulas, Samuel J. Lin, Bernard T. Lee, Donald Morris,  
478 Adam Tobias, Amit V. Khera, Melina Claussnitzer, Tune H. Pers, Antonio Giordano, Orr Ashenberg,  
479 Aviv Regev, Linus T. Tsai, and Evan D. Rosen. A single-cell atlas of human and mouse white adipose  
480 tissue. *Nature*, 603(7903):926–933, March 2022. tex.ids= emontSinglecellAtlasHuman2022a number:  
481 7903 publisher: Nature Publishing Group.
- 482 [9] Michiko Itoh, Hideaki Kato, Takayoshi Suganami, Kuniha Konuma, Yoshio Marumoto, Shuji Terai,  
483 Hiroshi Sakugawa, Sayaka Kanai, Miho Hamaguchi, Takahiro Fukaishi, et al. Hepatic crown-like struc-  
484 ture: a unique histological feature in non-alcoholic steatohepatitis in mice and humans. *PloS one*,  
485 8(12):e82163, 2013.
- 486 [10] Diego Adhemar Jaitin, Lorenz Adlung, Christoph A Thaiss, Assaf Weiner, Baoguo Li, Hélène Descamps,  
487 Patrick Lundgren, Camille Bleriot, Zhaoyuan Liu, Aleksandra Deczkowska, et al. Lipid-associated  
488 macrophages control metabolic homeostasis in a trem2-dependent manner. *Cell*, 178(3):686–698, 2019.
- 489 [11] Matthew A. Cottam, Heather L. Caslin, Nathan C. Winn, and Alyssa H. Hasty. Multiomics reveals  
490 persistence of obesity-associated immune cell phenotypes in adipose tissue during weight loss and weight  
491 regain in mice. *Nature Communications*, 13(1):2950, May 2022. Number: 1 Publisher: Nature Publish-  
492 ing Group.
- 493 [12] Masayuki Hata, Elisabeth M. M. A. Andriessen, Maki Hata, Roberto Diaz-Marin, Frédéric Fournier,

- 494 Sergio Crespo-Garcia, Guillaume Blot, Rachel Juneau, Frédérique Pilon, Agnieszka Dejda, Vera Gu-  
495 ber, Emilie Heckel, Caroline Daneault, Virginie Calderon, Christine Des Rosiers, Heather J. Melichar,  
496 Thomas Langmann, Jean-Sebastien Joyal, Ariel M. Wilson, and Przemyslaw Sapielha. Past history of  
497 obesity triggers persistent epigenetic changes in innate immunity and exacerbates neuroinflammation.  
498 *Science*, 379(6627):45–62, January 2023. Publisher: American Association for the Advancement of  
499 Science.
- 500 [13] Ada Weinstock, Emily J Brown, Michela L Garabedian, Stephanie Pena, Monika Sharma, Juan Lafaille,  
501 Kathryn J Moore, and Edward A Fisher. Single-cell rna sequencing of visceral adipose tissue leukocytes  
502 reveals that caloric restriction following obesity promotes the accumulation of a distinct macrophage  
503 population with features of phagocytic cells. *Immunometabolism*, 1, 2019.
- 504 [14] Bo Shan, Xiaoxia Wang, Ying Wu, Chi Xu, Zhixiong Xia, Jianli Dai, Mengle Shao, Feng Zhao, Shengqi  
505 He, Liu Yang, Mingliang Zhang, Fajun Nan, Jia Li, Jianmiao Liu, Jianfeng Liu, Weiping Jia, Yifu Qiu,  
506 Baoliang Song, Jing-Dong J. Han, Liangyou Rui, Sheng-Zhong Duan, and Yong Liu. The metabolic  
507 ER stress sensor IRE1 suppresses alternative activation of macrophages and impairs energy expenditure  
508 in obesity. *Nature Immunology*, 18(5):519–529, May 2017. Number: 5 Publisher: Nature Publishing  
509 Group.
- 510 [15] Brian F Zamarron, Taleen A Mergian, Kae Won Cho, Gabriel Martinez-Santibanez, Danny Luan,  
511 Kanakadurga Singer, Jennifer L DelProposto, Lynn M Geletka, Lindsey A Muir, and Carey N Lu-  
512 meng. Macrophage proliferation sustains adipose tissue inflammation in formerly obese mice. *Diabetes*,  
513 66(2):392–406, 2017.
- 514 [16] Brian F Zamarron, Cara E Porsche, Danny Luan, Hannah R Lucas, Taleen A Mergian, Gabriel Martinez-  
515 Santibanez, Kae Won Cho, Jennifer L DelProposto, Lynn M Geletka, Lindsey A Muir, et al. Weight  
516 regain in formerly obese mice hastens development of hepatic steatosis due to impaired adipose tissue  
517 function. *Obesity*, 28(6):1086–1097, 2020.
- 518 [17] Lucas Massier, Jutta Jalkanen, Merve Elmastas, Jiawei Zhong, Tongtong Wang, Pamela A.  
519 Nono Nankam, Scott Frendo-Cumbo, Jesper Bäckdahl, Narmadha Subramanian, Takuya Sekine, Alas-  
520 tair G. Kerr, Ben T. P. Tseng, Jurga Laurencikiene, Marcus Buggert, Magda Lourda, Karolina Kublick-  
521 iene, Nayanika Bhalla, Alma Andersson, Armand Valsesia, Arne Astrup, Ellen E. Blaak, Patrik L. Ståhl,  
522 Nathalie Viguerie, Dominique Langin, Christian Wolfrum, Matthias Blüher, Mikael Rydén, and Niklas  
523 Mejhert. An integrated single cell and spatial transcriptomic map of human white adipose tissue. *Nature*  
524 *Communications*, 14(1):1438, March 2023. Number: 1 Publisher: Nature Publishing Group.
- 525 [18] F. Alexander Wolf, Philipp Angerer, and Fabian J. Theis. SCANPY: large-scale single-cell gene ex-  
526 pression data analysis. *Genome Biology*, 19(1):1–5, December 2018. Number: 1 Publisher: BioMed  
527 Central.
- 528 [19] V. A. Traag, L. Waltman, and N. J. van Eck. From Louvain to Leiden: guaranteeing well-connected  
529 communities. *Scientific Reports*, 9(1):5233, March 2019. Number: 1 Publisher: Nature Publishing  
530 Group.
- 531 [20] Leland McInnes, John Healy, and James Melville. UMAP: Uniform Manifold Approximation and Pro-  
532 jection for Dimension Reduction. *arXiv:1802.03426 [cs, stat]*, September 2020. arXiv: 1802.03426.
- 533 [21] Matan Gavish and David L Donoho. The optimal hard threshold for singular values is  $4/\sqrt{3}$ . *IEEE*  
534 *Transactions on Information Theory*, 60(8):5040 – 5053, 2014.
- 535 [22] Oscar Franzén, Li-Ming Gan, and Johan L M Björkegren. PanglaoDB: a web server for exploration of  
536 mouse and human single-cell RNA sequencing data. *Database*, 2019:baz046, January 2019.
- 537 [23] Ying Ma and Xiang Zhou. Spatially informed cell-type deconvolution for spatial transcriptomics. *Nature*  
538 *Biotechnology*, 40(9):1349–1359, September 2022. Number: 9 Publisher: Nature Publishing Group.
- 539 [24] Chuan Li, Antoine Menoret, Cullen Farragher, Zhengqing Ouyang, Christopher Bonin, Paul Holvoet,  
540 Anthony T. Vella, and Beiyan Zhou. Single-cell transcriptomics-based MacSpectrum reveals macrophage



- 541 activation signatures in diseases. *JCI Insight*, 4(10), May 2019. `tex.ids= liSinglecellTranscriptomics-`  
542 `Based2019` publisher: American Society for Clinical Investigation.
- 543 [25] Chuan Li, Lili Qu, Alyssa J. Matz, Patrick A. Murphy, Yongmei Liu, Ani W. Manichaikul, Derek Aguiar,  
544 Stephen S. Rich, David M. Herrington, David Vu, W. Craig Johnson, Jerome I. Rotter, Wendy S. Post,  
545 Anthony T. Vella, Annabelle Rodriguez-Oquendo, and Beiyan Zhou. AtheroSpectrum Reveals Novel  
546 Macrophage Foam Cell Gene Signatures Associated With Atherosclerotic Cardiovascular Disease Risk.  
547 *Circulation*, 145(3):206–218, January 2022. Publisher: American Heart Association.
- 548 [26] M. E. J. Newman. *Networks*. Oxford University Press, Oxford, United Kingdom ; New York, NY,  
549 United States of America, second edition edition, 2018.
- 550 [27] Stéfan van der Walt, Johannes L. Schönberger, Juan Nunez-Iglesias, François Boulogne, Joshua D.  
551 Warner, Neil Yager, Emmanuelle Guillard, and Tony Yu. `scikit-image: image processing in Python`.  
552 *PeerJ*, 2:e453, June 2014. Publisher: PeerJ Inc.
- 553 [28] I. Felix, H. Jokela, J. Karhula, N. Kotaja, E. Savontaus, M. Salmi, and P. Rantakari. Single-cell  
554 proteomics reveals the defined heterogeneity of resident macrophages in white adipose tissue. 12:719979.
- 555 [29] Sarah A. Dick, Anthony Wong, Homaira Hamidzada, Sara Nejat, Robert Nechanitzky, Shabana Vohra,  
556 Brigitte Mueller, Rysa Zaman, Crystal Kantores, Laura Aronoff, Abdul Momen, Duygu Nechanitzky,  
557 Wanda Y. Li, Parameswaran Ramachandran, Sarah Q. Crome, Burkhard Becher, Myron I. Cybul-  
558 sky, Filio Billia, Shaf Keshavjee, Seema Mital, Clint S. Robbins, Tak W. Mak, and Slava Epelman.  
559 Three tissue resident macrophage subsets coexist across organs with conserved origins and life cycles.  
560 7(67):eabf7777.
- 561 [30] Connor Lantz, Behram Radmanesh, Esther Liu, Edward B. Thorp, and Jennie Lin. Single-cell  
562 RNA sequencing uncovers heterogenous transcriptional signatures in macrophages during efferocytosis.  
563 10(1):14333. Number: 1 Publisher: Nature Publishing Group.
- 564 [31] Rita Silva-Gomes, Sarah N Mapelli, Marie-Astrid Boutet, Irene Mattiola, Marina Sironi, Fabio Grizzi,  
565 Federico Colombo, Domenico Supino, Silvia Carnevale, Fabio Pasqualini, Matteo Stravalaci, Rémi Porte,  
566 Andrea Gianatti, Constantino Pitzalis, Massimo Locati, Maria José Oliveira, Barbara Bottazzi, and  
567 Alberto Mantovani. Differential expression and regulation of MS4A family members in myeloid cells in  
568 physiological and pathological conditions. *Journal of Leukocyte Biology*, 111(4):817–836, April 2022.
- 569 [32] Haoyang Li, Juexiao Zhou, Zhongxiao Li, Siyuan Chen, Xingyu Liao, Bin Zhang, Ruochi Zhang,  
570 Yu Wang, Shiwei Sun, and Xin Gao. A comprehensive benchmarking with practical guidelines for  
571 cellular deconvolution of spatial transcriptomics. *Nature Communications*, 14(1):1548, March 2023.  
572 Number: 1 Publisher: Nature Publishing Group.
- 573 [33] John M. Wentworth, Gaetano Naselli, Wendy A. Brown, Lisa Doyle, Belinda Phipson, Gordon K. Smyth,  
574 Martin Wabitsch, Paul E. O’Brien, and Leonard C. Harrison. Pro-Inflammatory CD11c+CD206+  
575 Adipose Tissue Macrophages Are Associated With Insulin Resistance in Human Obesity. *Diabetes*,  
576 59(7):1648–1656, March 2010.
- 577 [34] M. Aouadi, P. Vangala, J. C. Yawe, M. Tencerova, S. M. Nicoloso, J. L. Cohen, Y. Shen, and M. P.  
578 Czech. Lipid storage by adipose tissue macrophages regulates systemic glucose tolerance. *Am J Physiol*  
579 *Endocrinol Metab*, 307(4):E374–83, Aug 2014.
- 580 [35] Ville A. Palomäki, Petri Lehenkari, Sanna Meriläinen, Tuomo J. Karttunen, and Vesa Koivukangas.  
581 Dynamics of adipose tissue macrophage populations after gastric bypass surgery. *Obesity*, 31(1):184–  
582 191, 2023. `eprint: https://onlinelibrary.wiley.com/doi/pdf/10.1002/oby.23602`.
- 583 [36] Xiaoyuan Xu, Ambar Grijalva, Alicja Skowronski, Marco van Eijk, Mireille J Serlie, and Anthony W  
584 Ferrante Jr. Obesity activates a program of lysosomal-dependent lipid metabolism in adipose tissue  
585 macrophages independently of classic activation. 18(6):816–830. Type: Journal Article.
- 586 [37] M. Kratz, B. R. Coats, K. B. Hisert, D. Hagman, V. Mutskov, E. Peris, K. Q. Schoenfelt, J. N.  
587 Kuzma, I. Larson, P. S. Billing, R. W. Landerholm, M. Crouthamel, D. Gozal, S. Hwang, P. K. Singh,

- 588 and L. Becker. Metabolic dysfunction drives a mechanistically distinct proinflammatory phenotype in  
589 adipose tissue macrophages. *20*(4):614–25.
- 590 [38] Megan M. Robblee, Charles C. Kim, Jess Porter Abate, Martin Valdearcos, Karin L. M. Sandlund,  
591 Meera K. Shenoy, Romain Volmer, Takao Iwawaki, and Suneil K. Koliwad. Saturated fatty acids engage  
592 an IRE1-dependent pathway to activate the NLRP3 inflammasome in myeloid cells. *14*(11):2611–2623.
- 593 [39] Romain Volmer, Kattria van der Ploeg, and David Ron. Membrane lipid saturation activates en-  
594 doplasmic reticulum unfolded protein response transducers through their transmembrane domains.  
595 *110*(12):4628–4633. Publisher: Proceedings of the National Academy of Sciences.
- 596 [40] Bo Shan, Xiaoxia Wang, Ying Wu, Chi Xu, Zhixiong Xia, Jianli Dai, Mengle Shao, Feng Zhao, Shengqi  
597 He, Liu Yang, Mingliang Zhang, Fajun Nan, Jia Li, Jianmiao Liu, Jianfeng Liu, Weiping Jia, Yifu Qiu,  
598 Baoliang Song, Jing-Dong J. Han, Liangyou Rui, Sheng-Zhong Duan, and Yong Liu. The metabolic ER  
599 stress sensor IRE1 suppresses alternative activation of macrophages and impairs energy expenditure in  
600 obesity. *18*(5):519–529. Number: 5 Publisher: Nature Publishing Group.
- 601 [41] Guo-fang Chen, Ting-hai Xu, Yan Yan, Yu-ren Zhou, Yi Jiang, Karsten Melcher, and H. Eric Xu.  
602 Amyloid beta: structure, biology and structure-based therapeutic development. *Acta Pharmacologica*  
603 *Sinica*, *38*(9):1205–1235, September 2017. Number: 9 Publisher: Nature Publishing Group.
- 604 [42] Giuseppe Verdile, Kevin N. Keane, Vinicius F. Cruzat, Sandra Medic, Miheer Sabale, Joanne Rowles,  
605 Nadeeja Wijesekara, Ralph N. Martins, Paul E. Fraser, and Philip Newsholme. Inflammation and  
606 Oxidative Stress: The Molecular Connectivity between Insulin Resistance, Obesity, and Alzheimer’s  
607 Disease. *Mediators of Inflammation*, 2015:e105828, November 2015. Publisher: Hindawi.
- 608 [43] Shannon M Reilly and Alan R Saltiel. Adapting to obesity with adipose tissue inflammation. *Nature*  
609 *Reviews Endocrinology*, *13*(11):633–643, 2017.
- 610 [44] Cara E Porsche, Jennifer B Delproposto, Elise Patrick, Brian F Zamarron, and Carey N Lumeng.  
611 Adipose tissue dendritic cell signals are required to maintain t cell homeostasis and obesity-induced  
612 expansion. *Molecular and cellular endocrinology*, 505:110740, 2020.
- 613 [45] Cara E Porsche, Jennifer B Delproposto, Lynn Geletka, Robert O’Rourke, and Carey N Lumeng.  
614 Obesity results in adipose tissue t cell exhaustion. *JCI insight*, *6*(8), 2021.
- 615 [46] Tracy SP Heng, Michio W Painter, Kutlu Elpek, Veronika Lukacs-Kornek, Nora Mauermann, Shannon J  
616 Turley, Daphne Koller, Francis S Kim, Amy J Wagers, Natasha Asinovski, et al. The immunological  
617 genome project: networks of gene expression in immune cells. *Nature immunology*, *9*(10):1091–1094,  
618 2008.
- 619 [47] Duncan J. Watts and Steven H. Strogatz. Collective dynamics of ‘small-world’ networks. *Nature*,  
620 *393*(6684):440–442, June 1998. Number: 6684 Publisher: Nature Publishing Group.
